# Supplementary material for: Care seeking in tuberculosis: results from a countrywide cluster randomised survey in Bangladesh
Source: PubMed Central journal article supplement — BMJ Open. 2014 May 28;4(5):e004766. doi: 10.1136/bmjopen-2013-004766 (PMC4039849; doi:10.1136/bmjopen-2013-004766), 2014-05-28
Supplement: bmjopen-2013-004766.draft_revisions.pdf [file bmjopen-2013-004766.draft_revisions.pdf]

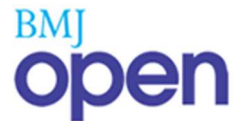

## Care seeking in tuberculosis: Results from a countrywide sample survey in Bangladesh

|                                 |                                                                                                                                                                                                                                                                                                                                                                                                                                                                                                                                                                                                                                                                                                                                                                                                                                                                                                                                                                               |
|---------------------------------|-------------------------------------------------------------------------------------------------------------------------------------------------------------------------------------------------------------------------------------------------------------------------------------------------------------------------------------------------------------------------------------------------------------------------------------------------------------------------------------------------------------------------------------------------------------------------------------------------------------------------------------------------------------------------------------------------------------------------------------------------------------------------------------------------------------------------------------------------------------------------------------------------------------------------------------------------------------------------------|
| Journal:                        | <i>BMJ Open</i>                                                                                                                                                                                                                                                                                                                                                                                                                                                                                                                                                                                                                                                                                                                                                                                                                                                                                                                                                               |
| Manuscript ID:                  | bmjopen-2013-004766                                                                                                                                                                                                                                                                                                                                                                                                                                                                                                                                                                                                                                                                                                                                                                                                                                                                                                                                                           |
| Article Type:                   | Research                                                                                                                                                                                                                                                                                                                                                                                                                                                                                                                                                                                                                                                                                                                                                                                                                                                                                                                                                                      |
| Date Submitted by the Author:   | 28-Dec-2013                                                                                                                                                                                                                                                                                                                                                                                                                                                                                                                                                                                                                                                                                                                                                                                                                                                                                                                                                                   |
| Complete List of Authors:       | Hossain, Shahed; International Centre for Diarrhoeal Disease Research, Bangladesh (icddr,b), Centre for Equity and Health Systems<br>Zaman, K; International Centre for Diarrhoeal Disease Research, Bangladesh (icddr,b),<br>Quaiyum, Abdul; International Centre for Diarrhoeal Disease Research, Bangladesh (icddr,b),<br>Banu, Sayera; International Centre for Diarrhoeal Disease Research, Bangladesh (icddr,b),<br>Husain, Ashaque; National Tuberculosis Control Programme, Directorate General of Health Services<br>Islam, Akramul; BRAC, BRAC Health Programme<br>Borgdorff, Martien; Department of Clinical Epidemiology, Academic Medical Center, University of Amsterdam; Centre for Infection and Immunity Amsterdam, Academic Medical Center, University of Amsterdam<br>van Leth, Frank; Department of Global Health, Academic Medical Centre, University of Amsterdam, Amsterdam Institute for Global Health and Development; KNCV Tuberculosis Foundation, |
| <b>Primary Subject Heading</b>: | Health services research                                                                                                                                                                                                                                                                                                                                                                                                                                                                                                                                                                                                                                                                                                                                                                                                                                                                                                                                                      |
| Secondary Subject Heading:      | Infectious diseases                                                                                                                                                                                                                                                                                                                                                                                                                                                                                                                                                                                                                                                                                                                                                                                                                                                                                                                                                           |
| Keywords:                       | Tuberculosis < INFECTIOUS DISEASES, Organisation of health services < HEALTH SERVICES ADMINISTRATION & MANAGEMENT, Care seeking , Informal provider, Bangladesh                                                                                                                                                                                                                                                                                                                                                                                                                                                                                                                                                                                                                                                                                                                                                                                                               |
|                                 |                                                                                                                                                                                                                                                                                                                                                                                                                                                                                                                                                                                                                                                                                                                                                                                                                                                                                                                                                                               |

SCHOLARONE™  
Manuscripts

## Care seeking in tuberculosis: Results from a countrywide sample survey in Bangladesh

Shahed Hossain<sup>1</sup>, K. Zaman<sup>1</sup>, Abdul Quaiyum<sup>1</sup>, Sayera Banu<sup>1</sup>, Ashaque Husain<sup>2</sup>, Akramul Islam<sup>3</sup>, Martien Borgdorff<sup>4,5,6</sup>, Frank van Leth<sup>7,8</sup>

<sup>1</sup>International Centre for Diarrhoeal Disease Research, Bangladesh (icddr,b), Dhaka, Bangladesh

<sup>2</sup>National TB Control Programme (NTP), DGHS, Dhaka, Bangladesh

<sup>3</sup>Health Programme, BRAC, Dhaka, Bangladesh

<sup>4</sup>Department of Clinical Epidemiology, Academic Medical Centre, University of Amsterdam, Amsterdam, The Netherlands

<sup>5</sup>Centre for Infection and Immunity Amsterdam, Academic Medical Centre, University of Amsterdam, The Netherlands

<sup>6</sup>Public Health Service, Amsterdam, The Netherlands

<sup>7</sup>Department of Global health, Academic Medical Centre, University of Amsterdam, Amsterdam Institute for Global Health and Development, Amsterdam, The Netherlands

<sup>8</sup>KNCV Tuberculosis Foundation, The Hague, The Netherlands

Key words: Tuberculosis; Care seeking; Informal providers; Bangladesh

1  
2  
3 Corresponding author:  
4

5 SHAHED HOSSAIN, MBBS, MSc  
6

7  
8 Associate Scientist, Centre for Equity and Health Systems (CEHS)  
9

10 icddr,b, Mohakhali, Dhaka-1212, Bangladesh  
11

12 Phone: 880-2-8812531  
13

14 Email: [shahed@icddr.org](mailto:shahed@icddr.org)  
15

16 Fax: 880 2 8823963  
17

18  
19 Word count: 2776 (excluding title page, abstract, Article summary, References, Tables and  
20  
21 Figures, acknowledgements, funding, contribution, competing interest, data sharing statement,  
22  
23 and ethics information)  
24  
25  
26  
27  
28  
29  
30  
31  
32  
33  
34  
35  
36  
37  
38  
39  
40  
41  
42  
43  
44  
45  
46  
47  
48  
49  
50  
51  
52  
53  
54  
55  
56  
57  
58  
59  
60

## ABSTRACT

**Objectives:** To explore systematically the care seeking trajectories of TB cases up to four subsequent places of care and to assess the type of services provided at each place.

**Methods:** Tuberculosis cases detected actively during 2007-09 national tuberculosis prevalence survey and passively under routine programme at the same period were interviewed by administering a standardized questionnaire. Care seeking and services provided up to four subsequent points were explored. Care seeking was further explored by categorizing the providers into formal, informal and 'self care' groups.

**Results:** A total 273 TB cases were included for this study, 33 (12.0%) were detected during survey and 240 (88.0%) from the TB registers. Out of the 118 passively detected cases who first sought care from informal provider, 52(44.0%), 17(32.6%) and 5(29.4%) remained in the informal sector at second, third and fourth subsequent points of care. All the 33 actively detected cases had "self care" at the first point, 27 (82%) remained with "self care" up to the fourth point of care. Prescribing drugs (59%-99%) was the major type of care provided by the both formal and informal care providers at each point with limited to nonexistent practice of investigation or referrals.

**Conclusions:** Free TB services are still underutilized by TB cases and informal care givers remained the major care providers for such cases in Bangladesh. In order to improve case detection it is necessary that the NTP immediately take initiatives to engage all types of care providers, particularly informal providers who are the first point of care for majority of the TB suspects.

## ARTICLE SUMMARY

### Article focus

- Documented care seeking and types of management received by the persons with TB symptoms at subsequent places of care.

### Key messages

- Initial care seeking by passively or actively detected TB cases happened at the informal sector or was limited to self care.
- About a third to half of the passively detected TB cases and majority of the actively detected TB cases utilized informal provider or self care for subsequent rounds of care.
- Case management in the informal sector was restricted to prescribing any medications, and almost without any diagnostic investigations or referrals.

### Strengths and limitations of this study

- Included both actively and passively detected TB cases from all over the country and explored wide spectrum of care seeking.
- Clusters were selected from the rural or urban areas equally which might not reflect the underlying population distribution of the country.

## INTRODUCTION

Bangladesh has successfully implemented Directly Observed Treatment, short-course (DOTS), the World Health Organization (WHO) advocated tuberculosis (TB) control strategy since 1993. By 2006, impressive case detection and cure rates were recorded. However, thereafter till date case notification became stagnant and even showed a declining trend.[1,2] It is likely that a large portion of cases still not reaching the National Tuberculosis Programme (NTP), and are probably getting treatment from private sector or not receiving care at all.[3-5]

The current TB control strategy is based, amongst others, on passive case detection, which is influenced by many health system and patient factors. The awareness of a person of her symptoms, and intention to seek care will influence care utilization.[6,7] In addition, availability and access to anti-TB services, as well as factors related to the provider like manners and actions might influence care seeking practices and outcomes. [8,9] Care seeking therefore is an important determinant that influences not only the individual's disease status and its prognosis, but also reflects on the epidemiology of TB in a community.

Care givers play a crucial role in the care seeking pathway of individuals with symptoms of tuberculosis. Health services in Bangladesh are delivered by both formal and informal providers. Within the organization of TB-control in Bangladesh, formal providers are licensed medical practitioners (public or private) graduated from a medical college, or health workers (public or through Non-Governmental Organizations) approved by the NTP, who received training to suspect, examine and refer TB cases to initiate TB treatment at DOTS centres.

1  
2  
3 Informal providers are non-qualified private practitioners who are not licensed or did not receive  
4 any formal training (e.g. village doctors, paramedics, pharmacy persons).[10,11] These informal  
5 providers are not accepted by the NTP to engage in TB-control activities.  
6  
7  
8  
9

10 Informal providers comprise 95% of the total health workers of Bangladesh. They are frequently  
11 the point of first care for TB and other chronic conditions due to many conditions including ease  
12 of access to their services. [4,12-15] However, case management within the informal sector  
13 remains unpredictable, and outcomes are hardly ever known.[13,16,17]  
14  
15  
16  
17  
18  
19  
20

21 With freely available DOTS services throughout the country, it was expected all persons  
22 irrespective of socio economic status would access and utilize this service. However, recent  
23 findings of the National TB prevalence survey 2007-2009 of Bangladesh revealed that, only 9%  
24 actively identified TB cases were known to the NTP, [18] indicating the others were remaining  
25 in the community either without treatment or getting treatment from elsewhere. The same survey  
26 showed that care utilization from DOTS centres was mostly restricted to the cases belonging to  
27 higher socio economic position (SEP), while prevalent TB cases were mainly seen on the lower  
28 SEP strata.[5] These findings indicate that only availability of a service does not ensure its  
29 utilization, as it has also been observed in other sectors.[8]  
30  
31  
32  
33  
34  
35  
36  
37  
38  
39  
40  
41  
42  
43  
44

45 With inadequate or absent initial care of TB cases fueling further transmission of the disease in  
46 the general population, it is important to understand the care seeking pathway of the persons with  
47 TB symptoms with respect to where care is initiated, and what action is taken by the care  
48 provider at presentation of an individual with chronic cough (as a strong marker for possible  
49 TB). The course of the disease is probably much determined in the point of first contact and in  
50 the subsequent points.  
51  
52  
53  
54  
55  
56  
57  
58  
59  
60

1  
2  
3 In this study we interviewed TB cases detected actively in a national TB prevalence survey, and  
4 cases detected passively under routine programme conditions. The objective was to explore their  
5 care seeking behavior up to four subsequent points of taking care. The study will identify areas  
6 to target by NTP for improved implementation of its activities to increase case finding and  
7 appropriate care.  
8  
9  
10  
11  
12  
13  
14  
15  
16  
17  
18  
19  
20  
21  
22  
23  
24  
25  
26  
27  
28  
29  
30  
31  
32  
33  
34  
35  
36  
37  
38  
39  
40  
41  
42  
43  
44  
45  
46  
47  
48  
49  
50  
51  
52  
53  
54  
55  
56  
57  
58  
59  
60

For peer review only



## METHODS AND MATERIALS

**Setting and Study population:** The study was embedded within the National TB prevalence survey, Bangladesh carried out throughout the country during 2007-2009. This was a cross sectional survey which included 40 randomly selected clusters.[18] Sub-districts were the primary sampling units which were selected proportional to population size. Nearly 52,000 adults ( $\geq 15$  years) were included for sputum examination and 33 new smear positive TB cases were identified. For this analysis, we interviewed all these 33 actively detected cases and included 6 controls per cluster. The controls were the most recent passively detected cases under treatment from the TB registers of the each of 40 clusters' DOTS centres. All the cases were new smear positive pulmonary TB cases, and were diagnosed by direct sputum smear microscopy as per NTP guidelines. The detail of methodology is described elsewhere.[18]

**Data collection:** Data were collected by interviewing all detected survey cases at their households. A standard questionnaire was administered by trained survey coordinators immediately after the diagnosis of a case in the survey. The initial questionnaire was translated into Bangla, pre tested, and revised to incorporate review comments from users and experts. The survey coordinators received one week training at the Dhaka project office. The training included through understanding of the components of the questionnaire, and interview techniques to obtain reliable answers. The particulars of the 240 NTP cases were obtained from the TB register at the cluster-specific DOTS centre, after which the persons were visited at their home for an interview. Informed written consent was taken from all participants. All completed questionnaires were checked for completeness and appropriateness by a supervisor, who also re-interviewed a number of cases from randomly selected clusters for cross checking.

1  
2  
3 **Measurements:** The interviews provided information on the demographics, symptom profile of  
4 the cases, Socio-Economic Position (SEP), care utilization pattern, and services received at each  
5 point of care visited. The demographic data included age, sex, place of residence, levels of  
6 education and occupation. SEP was assessed by asset estimation.[19] The symptom profile  
7 recorded the symptoms presented at first care seeking. The care seeking data provided  
8 information on where care was sought, in what order, and what measures were taken by the  
9 providers at each point. The detail of socio economic data collection is described elsewhere.[5]

10  
11  
12  
13  
14  
15  
16  
17  
18  
19  
20  
21 **Statistical approach:** Data were analyzed using the statistical package Stata 12.0 (Stata Corp.,  
22 U.S.A.). The initial general description provides the characteristics of the study population. Age,  
23 education, occupation and symptoms variables were presented into natural sub groups. The asset  
24 estimation was based on set of assets the household possessed and a weight was allocated to each  
25 generated through a principal component analysis.[20] We included items and methods as  
26 standardized and followed by Bangladesh Demographic and Health Survey 2001.[20,21] The  
27 SEP of the study population was divided into quartiles. Care seeking from first to fourth  
28 subsequent points was explored. The types of providers were categorized as formal or informal  
29 as described earlier. We added a group as “self care” to denote the use of any treatment obtained  
30 outside the formal or informal health sector (eg. home remedies, self medication).

31  
32  
33  
34  
35  
36  
37  
38  
39  
40  
41  
42  
43  
44  
45  
46  
47  
48  
49  
50  
51  
52  
53  
54  
55  
56  
57  
58  
59  
60

Measures taken at each point of care seeking were grouped in four categories. These were only  
advices offered, investigations ordered, medications given, or referred for further investigations.

The care seeking and actions taken were reported by the patients at interview, we did not verify  
them either by checking prescription or by any other methods. We focused our analysis on the  
care seeking patterns of those cases who initiated their care seeking trajectory at the informal  
care sector.

## RESULTS

A total 273 TB cases were included for this study, 33 (12.0%) were detected during survey and 240 (88.0%) from the TB registers. Among the participants 120 (44%) were below 34 years of age, and 176 (64.5%) were male. Participants were almost equally from rural and urban areas. Fifty percent of the cases presented with more than 5 symptoms. Most of the participants had cough, of which 81% for 15 days or more (Table 1). Among those, the mean delay from onset of symptoms to seek any care from any provider was 31 days, which was 20 days for survey case , and 33 days for the NTP cases under NTP.

**Table 1: Socio demographic characteristics of NTP and survey tuberculosis cases**

| Characteristics           | All    |      | Survey cases |      | NTP cases |      | P value |
|---------------------------|--------|------|--------------|------|-----------|------|---------|
|                           | N(273) | %    | n(33)        | %    | n(240)    | %    |         |
| <b>Age in years</b>       |        |      |              |      |           |      |         |
| 15-34                     | 120    | 43.9 | 8            | 24.2 | 112       | 46.6 | 0.028   |
| 35-54                     | 87     | 31.9 | 12           | 36.6 | 75        | 31.2 |         |
| 55+                       | 66     | 25.0 | 13           | 39.9 | 53        | 22.1 |         |
| <b>Sex</b>                |        |      |              |      |           |      |         |
| Male                      | 176    | 64.5 | 24           | 72.7 | 152       | 63.3 | 0.290   |
| Female                    | 97     | 35.5 | 9            | 27.7 | 88        | 36.7 |         |
| <b>Residence</b>          |        |      |              |      |           |      |         |
| Rural                     | 140    | 51.3 | 20           | 60.6 | 120       | 50.0 | 0.253   |
| Urban                     | 133    | 48.7 | 13           | 39.4 | 120       | 50.0 |         |
| <b>Education</b>          |        |      |              |      |           |      |         |
| 0                         | 71     | 26.0 | 15           | 45.5 | 55        | 23.0 | 0.039   |
| 1-5                       | 71     | 26.0 | 8            | 24.2 | 65        | 27.1 |         |
| 6-10                      | 68     | 24.9 | 6            | 18.2 | 62        | 25.8 |         |
| 10+                       | 63     | 23.1 | 4            | 12.1 | 58        | 24.2 |         |
| <b>Occupation</b>         |        |      |              |      |           |      |         |
| Agri based                | 37     | 13.6 | 4            | 12.1 | 33        | 13.8 | 0.003   |
| Daily wagers              | 89     | 22.3 | 14           | 42.4 | 75        | 31.3 |         |
| Sales and services        | 115    | 28.2 | 6            | 18.2 | 109       | 45.4 |         |
| Others                    | 32     | 35.9 | 9            | 27.3 | 23        | 9.6  |         |
| <b>Asset Quartiles</b>    |        |      |              |      |           |      |         |
| 1 <sup>st</sup> (Lowest)  | 17     | 6.2  | 12           | 36.4 | 5         | 2.0  | 0.000   |
| 2 <sup>nd</sup>           | 111    | 40.6 | 13           | 39.4 | 98        | 41.0 |         |
| 3 <sup>rd</sup>           | 113    | 41.4 | 5            | 15.1 | 108       | 45.0 |         |
| 4 <sup>th</sup>           | 32     | 11.8 | 3            | 9.1  | 29        | 12.0 |         |
| <b>Presence of cough</b>  |        |      |              |      |           |      |         |
| Yes                       | 226    | 82.8 | 29           | 87.8 | 197       | 82.1 | 0.408   |
| No                        | 47     | 17.2 | 4            | 12.2 | 43        | 17.9 |         |
| <b>Duration of cough</b>  |        |      |              |      |           |      |         |
| Less than 14 days         | 51     | 18.7 | 6            | 18.2 | 45        | 18.2 | 0.937   |
| ≥ 15 days                 | 222    | 81.3 | 27           | 81.8 | 195       | 81.8 |         |
| <b>Number of symptoms</b> |        |      |              |      |           |      |         |
| ≤ 2                       | 44     | 16.1 | 4            | 12.1 | 40        | 16.7 | 0.556   |
| 3-4                       | 79     | 29.0 | 8            | 24.2 | 71        | 29.6 |         |
| 5+                        | 150    | 54.9 | 21           | 63.7 | 129       | 53.8 |         |

1  
2  
3 Among the 240 cases detected passively under NTP, 118 (49%) sought initial care from informal  
4 providers, 106 (44.2%) from formal providers, and 16 (6.7%) used self care. All of the 33  
5 actively detected cases reported self care as the initial strategy, totaling this group to 49 (17.9%)  
6 of all cases (Fig 1). Out of the 118 passively detected NTP cases with initial care from the  
7 informal sector, 52 (44.0%) remained in the informal sector, while 61 (51.7%) switched to a  
8 formal provider for care at the second point care. Again, among the 52 who remained in the  
9 informal care sector, at the third point of care 32 (61.5%) migrated to formal care sector, while  
10 17 (32.6%) remained in the informal sector. The proportion of patient who remained in the  
11 informal care sector up to the fourth point care was 29.4% of those stating their health seeking  
12 behavior in the informal sector. (Fig 1). Among the 16 (6.7%) of the NTP cases who reported  
13 self care as their initial strategy ultimately 4 (25%) remained in this stage up to fourth point of  
14 care, three (19%) moved to informal sector and nine (56%) migrated to formal care sector  
15 subsequently. Among the active detected cases, all of whom had self care as the initial strategy,  
16 27 (81.8%) remained at this stage before being detected by the survey. Among the remaining  
17 six, three shifted to the formal sector at the second point of care, while the other three switched  
18 between informal and formal providers in the subsequent points of care (Not shown).

19  
20  
21 We looked into measures taken at each point of care by the formal and informal providers. In the  
22 formal care sector, the primary action was to prescribe drugs at each point of care starting with  
23 79 (74.5%) at first point, 43 (70.5%) at the second point, 19 (59.4%) at the third and 10 (91%) at  
24 the fourth point of care. Ordering diagnostic investigations varied from 19 (17.9%) at the first  
25 point of care, to 14 (22.9%) at the second, 10 (31.2%) at the third, and 1 (9.0%) at the fourth  
26 point of care. Referral for further investigation was seldom done (0-2%). The informal providers  
27 on the other hand, prescribed drugs in 80% to 99% of the encounters, and seldom ordered

1  
2  
3 diagnostic investigations or referred the individual for further investigations at any of the four  
4  
5 points of care. (Fig 2).  
6  
7

8  
9 The reasons for not seeking care at all were available only from the 33 survey cases. The major  
10  
11 reasons were not considering symptoms serious enough, and monetary constraints.  
12  
13

14  
15  
16  
17  
18  
19  
20  
21  
22  
23  
24  
25  
26  
27  
28  
29  
30  
31  
32  
33  
34  
35  
36  
37  
38  
39  
40  
41  
42  
43  
44  
45  
46  
47  
48  
49  
50  
51  
52  
53  
54  
55  
56  
57  
58  
59  
60

For peer review only

## DISCUSSION

Our study showed that most of the initial care seeking by passively identified TB cases happened at the informal sector or was limited to self care. At each following round of care seeking a third to a half remained in the informal care sector. Among active detected cases, more than 80% remained in the self care sector up to the time of their identification by the survey. Case management in the informal sector was restricted to prescribing any medications, with non existence of any diagnostic investigations or referrals.

Preference for informal providers as initial place of care has been reported from Bangladesh and elsewhere.[3-5,9,12] In chronic conditions where the symptoms onset is slow and insidious like tuberculosis, people usually consult with an informal provider available at hand or consume over the counter drugs. This behavior can cause a marked delay to starting appropriate TB medication, given the fact that TB medication in line with the NP guideline is seldom present in the informal health sector. This has been observed in earlier studies from Bangladesh.[4] Our study adds the important finding that this preference of the informal sector persists throughout the care seeking trajectory. The lack of (referral for) diagnostic investigation can cause additional systems delay (between care seeking and starting appropriate treatment). In an earlier study this type of delay could be more than ten weeks.[4] Delay to reach appropriate care and treatment impacts on the course of the disease and may result in unfavorable outcomes and ongoing transmission.[22]

From a programmatic point of view, this situation leads to a marked under reporting of TB cases.

Care seeking from the informal sector is not limited to TB only, but rather a common feature for all chronic conditions in Bangladesh.[15,23] It is suggested that the presence of huge numbers of informal providers in both rural and urban areas, their easy accessibility due to reduced cost, and

1  
2  
3 minimal levels of stigma when attending such providers, encourage people to seek care from this  
4 sector first.[15,23,24] A good portion of them are simple drug sellers providing drugs without  
5 further diagnostic procedures.[12] The easy access to informal providers paves the way  
6  
7  
8 “shopping for care”, in which care is sought from sequential informal providers as observed in  
9  
10  
11 our study. In Malawi, care seeking among TB patients noted that multiple contacts in range of  
12  
13 1-15 were made before the diagnosis.[25] Similarly in Vietnam patients made on average 1.3  
14  
15 contacts and 2.5 visits per providers before getting appropriate TB services, even though the size  
16  
17 private sector was very small.[26]  
18  
19  
20

21  
22  
23 We observed that the case management was not altogether different in the formal and informal  
24  
25 sector with respect to prescribing drugs. However, unlike in the formal sector, there was almost  
26  
27 a complete absence of diagnostic procedures and referrals in the informal sector. We need to  
28  
29 carefully interpret these findings as we don't have information what drugs were prescribed by the  
30  
31 providers. Retrospective recording of actual drugs through patient interviews is difficult and in  
32  
33 most cases unreliable. In Bangladesh, Fixed Dose Combination (FDC) anti TB drugs are almost  
34  
35 exclusively available at DOTS centres. This implies that medication provided through the  
36  
37 informal sector is unlikely to be adequate for the management of TB. But formal providers can  
38  
39 manage TB cases outside the context of DOTS centres. As such mismanagement of TB can also  
40  
41 occur in the formal sector, given the low occurrence of diagnostic investigations.  
42  
43  
44  
45  
46

47  
48 A study in Malawi provided insight in the type of medication provided to individuals with TB  
49  
50 symptoms but without a formal diagnosis. The authors reported that 61% of cases had been  
51  
52 treated with antibiotics like co-trimoxazole, doxycycline, and penicillin.[25]  
53  
54  
55  
56  
57  
58  
59  
60



1  
2  
3 Despite the clear findings of the strong presence of the informal health sector in Bangladesh, the  
4  
5 NTP does not strongly embark on initiatives to engage these providers in TB-control activities.  
6  
7  
8 The lessons learnt from studies aimed at establishing connections between formal and informal  
9  
10 health care providers remain unexplored.[13,27] Our study indicates that despite the country  
11  
12 coverage by DOTS, and public-private-partnership activities undertaken by the NTP, the impact  
13  
14 did not result in reducing the disconnect between NTP and the informal health sector. In a recent  
15  
16 attempt to improve the situation, NTP in partnership with icddr,b and United States Agency for  
17  
18 International Development (USAID) is implementing a “Translating research into action  
19  
20 (TRAction)” project to test different implementation strategies, with a clear role for the informal  
21  
22 providers. This current study suggests that attempt is timely and needed.  
23  
24  
25  
26

27  
28 One of the potential limitations of the study is the potential for minor selection bias. Although all  
29  
30 participants were randomly selected, the selection of clusters was not stratified by urban/rural  
31  
32 setting. The study sample therefore does not fully represent the 70% of the rural population in  
33  
34 Bangladesh. There was also a slight overrepresentation of males. However the national case  
35  
36 notification is more or less static at 3:1 male to female since the inception of DOTS in 1993.[1]  
37  
38  
39 The strengths of the study are that the cases were interviewed at home by trained research  
40  
41 coordinators providing an enabling study setting. We explored the care seeking of both actively  
42  
43 and passively detected cases which would cover care seeking from a wider perspective of two  
44  
45 different kinds of cases, one who is probably in the early phase of the disease process and the  
46  
47 other probably in a more advanced condition. Moreover we have covered the care seeking up to  
48  
49 fourth point of care, which is expected to give a more comprehensive picture of the care seeking  
50  
51 by the TB cases in Bangladesh.  
52  
53  
54  
55  
56  
57  
58  
59  
60

1  
2  
3 In conclusions it can be said that most of the initial care seeking by different types of TB cases  
4 was sought form informal providers or was limited to self care, and that a large proportion of  
5 these cases remained in the informal sector during subsequent care seeking. It is imperative that  
6 the NTP should immediately take initiatives to engage all types of care providers, particularly the  
7 informal providers. It is also necessary to strengthen the ongoing advocacy communication and  
8 social mobilization (ACSM) activities to increase awareness on key TB symptoms, availability  
9 of diagnosis and free treatment in an attempt to stimulate appropriate care seeking, and prevent  
10 unnecessary delay in TB case management.  
11  
12  
13  
14  
15  
16  
17  
18  
19  
20  
21  
22  
23  
24  
25  
26  
27  
28  
29  
30  
31  
32  
33  
34  
35  
36  
37  
38  
39  
40  
41  
42  
43  
44  
45  
46  
47  
48  
49  
50  
51  
52  
53  
54  
55  
56  
57  
58  
59  
60

## Acknowledgements

We thankfully acknowledge National Tuberculosis Control Programme (NTP) of Bangladesh for their continuous support throughout this study. We also acknowledge the technical assistance provided by KNCV Tuberculosis Foundation, The Netherlands. Our thanks go to all NTP partners like BRAC, Damien Foundation and others and individuals involved in this survey for their support throughout the study period. We sincerely acknowledge the contribution of our project staff and community members from all over the country, without whom this study would never have been materialized.

**Contributors** Shahed Hossain was responsible for conception and design of the study, analysis and interpretation of data and writing the manuscript. Martien Borgdorff, Frank van Leth and K Zaman participated in the conception and design of the study, analysis and interpretation of data as well as revising the draft. Abdul Quaiyum, Sayera Banu, Ashaque Husain and Akramul Islam participated in the analysis and interpretation of data and substantially revising the paper.

**Funding** This research study was funded by World Health Organization (WHO), United States Agency for International Development (USAID) and Global Fund to Fight AIDS, Tuberculosis and Malaria (GFATM), grant number SEBAN TUB 001 XW06U. icddr,b acknowledges with gratitude the commitment of WHO, USAID and GFATM to its research efforts.

The funders had no role in the study design, data collection and analysis, decision to publish or preparation of the manuscript.

**Competing interest:** None

1  
2  
3 **Ethics approval** This study was approved through an Institutional Review Board of icddr,b  
4  
5 (IRB, FWA-00001468) which is internationally accorded and participated by members from  
6  
7 international and national experts. Verbal and written consent was obtained in all cases after  
8  
9 informed appraisal.  
10  
11

12  
13 **Data sharing statement** Additional data from this survey are being analyzed and will be  
14  
15 published in future  
16  
17  
18  
19  
20  
21  
22  
23  
24  
25  
26  
27  
28  
29  
30  
31  
32  
33  
34  
35  
36  
37  
38  
39  
40  
41  
42  
43  
44  
45  
46  
47  
48  
49  
50  
51  
52  
53  
54  
55  
56  
57  
58  
59  
60

1  
2  
3  
4  
5  
6  
7  
8  
9  
10  
11  
12  
13  
14  
15  
16  
17  
18  
19  
20  
21  
22  
23  
24  
25  
26  
27  
28  
29  
30  
31  
32  
33  
34  
35  
36  
37  
38  
39  
40  
41  
42  
43  
44  
45  
46  
47  
48  
49  
50  
51  
52  
53  
54  
55  
56  
57  
58  
59  
60  
**REFERENCES**

1. World Health Organization. *Global Tuberculosis Report 2013*. World Health Organization, Geneva. WHO/HTM/TB/2013.11
2. Directorate General of Health Services (DGHS). *Tuberculosis in Bangladesh: Annual Report 2012*. National Tuberculosis Control Programme (NTP), Dhaka.
3. Zafar Ullah AN, Haque R, Begum V, *et al*. Public Private Partnership for TB control in Bangladesh: role of medical practitioners in management of TB patients. *World Medical & Health Policy* 2010; 2:217-34.
4. Rifat M, Rusen ID, Islam MDA, *et al*. Why are tuberculosis patients not treated earlier? A study of informal health practitioners in Bangladesh. *Int J Tuberc Lung Dis* 2011;15:647-51.
5. Hossain S, Quaiyum MA, Zaman K, *et al*. Socio Economic Position in TB Prevalence and Access to Services: Results from a Population Prevalence Survey and a Facility-Based Survey in Bangladesh. *PLoS ONE* 2012; 7:1-8. <http://www.plosone.org/article/info:doi/10.1371/journal.pone.0044980> (Accessed: 5 August 2013).
6. Rieder H. Case finding in Tuberculosis: a comprehensive international approach. In: L. Reichman & E. Hershfield (eds). Marcel Dekker Inc, New York, 1993;167-182.
7. Pinto LM, Udwardia ZF. Private patients' apperceptions about a public programme; what do private Indian tuberculosis patients really feel about directly observed treatment? *BMC Public Health* 2010; 10 (357);1-5. <http://www.biomedcentral.com/1471-2458/10/357> (Accessed: 5 August 2013).
8. Gwatkin DR, Bhuiya A, Victora CG. Making Health Systems more Equitable. *Lancet*, 2004;364,1273-80.

- 1  
2  
3 9. Yimer S, Holm-Hansen C, Yimaldu T, *et al.* Health care seeking among pulmonary  
4 tuberculosis suspects and patients in rural Ethiopia: a community-based study. *BMC Public*  
5  
6 *Health* 2009; 9(454):1-9. <http://www.biomedcentral.com/1471-2458/9/454> (Accessed: 5  
7  
8 August 2013).
- 9  
10  
11  
12 10. Ahmed SM, Evans TG, Standing H, *et al.* Bangladesh: Innovation for Universal Health  
13 Coverage 2: Harnessing pluralism for better health in Bangladesh. *Lancet* 2013; 382: 1746–  
14  
15 55.
- 16  
17  
18  
19 11. Director General of Health Services (DGHS). *National TB guidelines 2009*, Fourth edition,  
20  
21 2009; Ministry of Health and Family Welfare, Government of Bangladesh.
- 22  
23  
24  
25 12. Hossain S, Larson CP, Quaiyum MA, *et al.* Adults with chronic cough in urban Bangladesh:  
26  
27 healthcare utilization and management of cases by private practitioners. *World Health &*  
28  
29 *Population* 2010;12:5-17.
- 30  
31  
32 13. Zafar Ullah AN, Huque R, Husain A, *et al.* Effectiveness of involving the private medical  
33  
34 sector in the National TB Control Programme in Bangladesh: evidence from mixed  
35  
36 methods. *BMJ Open* 2012;2(6):1-8. <http://bmjopen.bmj.com/content/2/6/e001534.long>  
37  
38 (Accessed: 5 August, 2013).
- 39  
40  
41 14. Ahmed SM, Hossain MA. Mapping of the health care providers in Bangladesh. In: James P  
42  
43 Grant School of Public Health, Health Workforce in Bangladesh: Who constitutes the  
44  
45 healthcare system? The state of health in Bangladesh 2007, *Bangladesh Health Watch 2007*.  
46  
47 BRAC University, Dhaka.2008.
- 48  
49  
50 15. Desmet M, Bashir I, Sohel N. Illness profile and health care utilization patterns of slum  
51  
52 residence in Dhaka city, Bangladesh. Health care seeking studies. International Centre for  
53  
54  
55  
56  
57  
58  
59  
60

- 1  
2  
3 Diarrhoeal Disease research, Bangladesh (ICDDR,B): Dhaka. *ICDDR,B Working Paper*  
4  
5  
6 *No.111. 1998;128-132.*  
7
- 8 16. World Health Organization. Involving private practitioners in tuberculosis control: Issues,  
9  
10 interventions, and emerging policy framework. World Health Organization, Geneva 2001;  
11  
12 WHO/CDS/TB/2001.285.  
13
- 14 17. Malmborg R, Mann G, Thomson R, *et al.* Can Public-private collaboration promote  
15  
16 tuberculosis case detection among the poor and vulnerable? *Bulletin of the World Health*  
17  
18 *Organization* 2006;84:752-58  
19
- 20 18. Zaman K, Hossain S, Banu S, *et al.* Prevalence of smear positive tuberculosis in persons  
21  
22 aged  $\geq 15$  years in Bangladesh: results from a national survey 2007-2009. *Epidemiology*  
23  
24 *and Infection* 2012;140:1018-27.  
25  
26
- 27 19. van Leth F, Guilatco RS, Hossain S, *et al.* Measuring socio economic data in tuberculosis  
28  
29 prevalence surveys. *Int J Tuberc Lung Dis* 2011;15: 558-63.  
30  
31
- 32 20. Gwatkin DR, Rutstein S, Johnson K, *et al.* Country reports on HNP and Poverty. *Socio-*  
33  
34 *Economic Differences in Health, Nutrition and Population. Bangladesh: 1996/97,*  
35  
36 *1999/2000, 2004.* Washington, DC, World Bank, Human Development Network, Health,  
37  
38 Nutrition and Population.  
39  
40
- 41 21. Bangladesh Demographic and health Survey 1999-2000. National Institute of population,  
42  
43 Research and Training (NIPORT), Mitra and Associates, Measure DHS+, ORC Macro,  
44  
45 Calverton, Maryland, USA. 2001.  
46  
47
- 48 22. Jianzhao H, van den Hof S, Lin X, *et al.* Risk factors for non-cure among new sputum smear  
49  
50 positive tuberculosis patients treated in tuberculosis dispensaries in Yunnan, China. *BMC*  
51  
52  
53  
54  
55  
56  
57  
58  
59  
60

1  
2  
3 *Health Services Research* 201;1: 97.<http://www.biomedcentral.com/1472-6963/11/97>

4  
5  
6 (Accessed: August 7, 2013).

- 7  
8 23. Ahmed SM. *Exploring health-seeking behaviour of disadvantaged populations in rural*  
9  
10 *Bangladesh*. PhD Thesis. Karolinska Institutet. Stockholm 2005.
- 11  
12 24. Ahmed SM, Hossain MA, Chowdhury MR. Informal sector providers in Bangladesh: how  
13  
14 equipped are they to provide rational health care? *Health Policy and Planning* 2009;24,467–  
15  
16 78.
- 17  
18 25. Salaniponi FML, Harries AD, Banda HT, *et al.* Care seeking behaviour and diagnostic  
19  
20 processes in patients with smear-positive pulmonary tuberculosis in Malawi. *Int J Tuberc*  
21  
22 *Lung Dis* 2000;4:327-32.
- 23  
24 26. Lonroth K, Thuong LM, Linh PD, *et al.* Utilization of private and public health care  
25  
26 providers for tuberculosis symptoms in Ho Chi Minh city, Vietnam. *Health Policy and*  
27  
28 *Planning* 2001;16:47-54.
- 29  
30 27. Salim HMA, Uplekar M, Daru P, *et al.* Turning liabilities into resources: Informal village  
31  
32 doctors and tuberculosis control in Bangladesh. *Bulletin of World Health Organization*  
33  
34 2006;84:479-84.
- 35  
36  
37  
38  
39  
40  
41  
42  
43  
44  
45  
46  
47  
48  
49  
50  
51  
52  
53  
54  
55  
56  
57  
58  
59  
60



1  
2  
3 **Fig 1: Care seeking at different points of care**  
4  
5  
6  
7

8 **Fig 2: Actions taken if care sought from formal and informal providers**  
9  
10  
11  
12  
13  
14  
15  
16  
17  
18  
19  
20  
21  
22  
23  
24  
25  
26  
27  
28  
29  
30  
31  
32  
33  
34  
35  
36  
37  
38  
39  
40  
41  
42  
43  
44  
45  
46  
47  
48  
49  
50  
51  
52  
53  
54  
55  
56  
57  
58  
59  
60

For peer review only

1  
2  
3  
4  
5  
6  
7  
8  
9  
10  
11  
12  
13  
14  
15  
16  
17  
18  
19  
20  
21  
22  
23  
24  
25  
26  
27  
28  
29  
30  
31  
32  
33  
34  
35  
36  
37  
38  
39  
40  
41  
42  
43  
44  
45  
46  
47  
48  
49  
50  
51  
52  
53  
54  
55  
56  
57  
58  
59  
60

Fig 1: Care seeking at different points of care

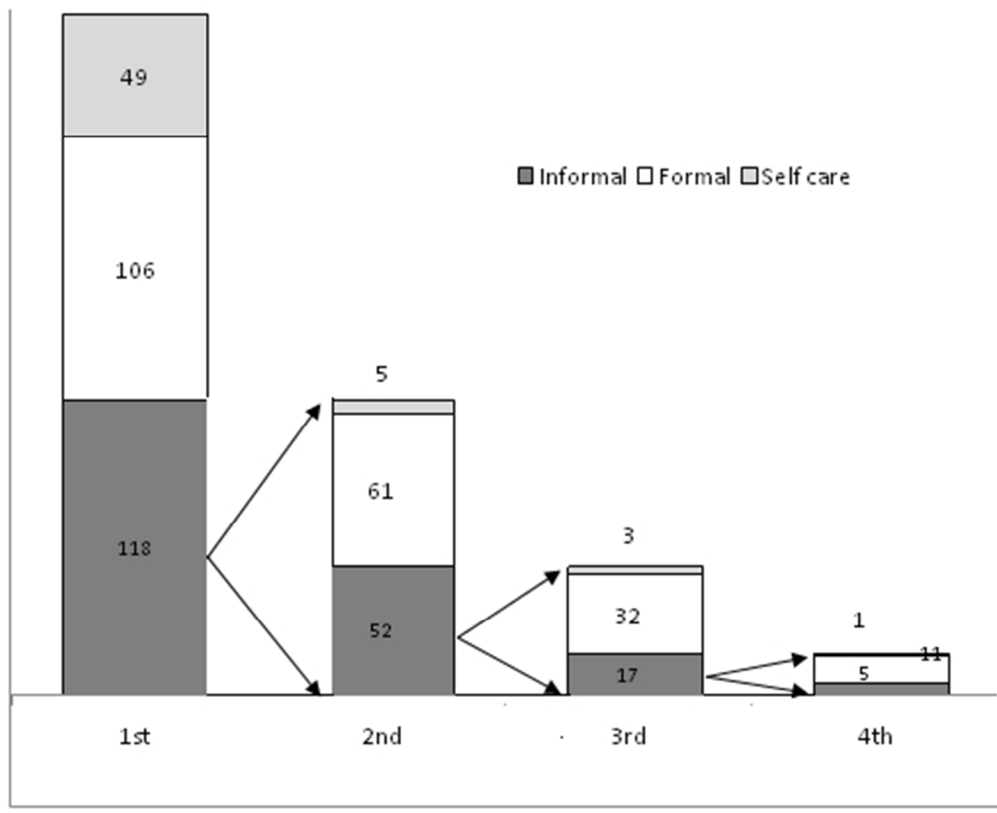

135x117mm (96 x 96 DPI)

Fig 2: Actions taken if care sought from formal and informal providers

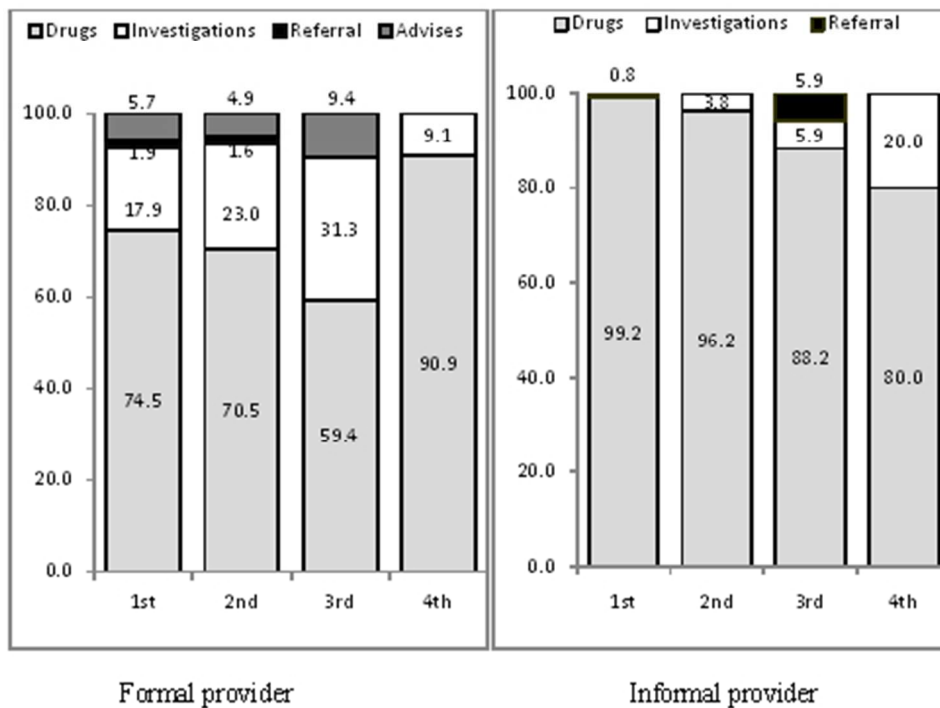

135x108mm (96 x 96 DPI)

Peer Review Only

## STROBE Statement—checklist of items that should be included in reports of observational studies

|                              | Item No | Recommendation                                                                                                                                                                                                                                                                                                                 |
|------------------------------|---------|--------------------------------------------------------------------------------------------------------------------------------------------------------------------------------------------------------------------------------------------------------------------------------------------------------------------------------|
| <b>Title and abstract</b>    | 1       | (a) Study's design is mentioned in the title and abstract<br>(b) Precise and concise information on study methods and findings given in the abstract                                                                                                                                                                           |
| <b>Introduction</b>          |         |                                                                                                                                                                                                                                                                                                                                |
| Background/rationale         | 2       | Comprehensive background and rationale provided                                                                                                                                                                                                                                                                                |
| Objectives                   | 3       | Specific objectives described                                                                                                                                                                                                                                                                                                  |
| <b>Methods</b>               |         |                                                                                                                                                                                                                                                                                                                                |
| Study design                 | 4       | Specific design adopted with relevant references are given                                                                                                                                                                                                                                                                     |
| Setting                      | 5       | The setting is adequately described with all relevant information and references.<br>One relevant document is uploaded.                                                                                                                                                                                                        |
| Participants                 | 6       | (a) <i>Cross-sectional study</i> —Sources and methods of data collection are given as separate paragraphs.                                                                                                                                                                                                                     |
| Variables                    | 7       | All the variables are defined and adequate explanation given.                                                                                                                                                                                                                                                                  |
| Data sources/<br>measurement | 8*      | A separate paragraph on measurement described details on methods of assessment.                                                                                                                                                                                                                                                |
| Bias                         | 9       | Described in discussion and limitation section                                                                                                                                                                                                                                                                                 |
| Study size                   | 10      | Explained                                                                                                                                                                                                                                                                                                                      |
| Quantitative variables       | 11      | A details description on statistical analysis is given                                                                                                                                                                                                                                                                         |
| Statistical methods          | 12      | (a) All statistical methods described<br>(b) Described examination of subgroups<br>(c) No possible missing data anticipated<br>(d) <i>Cross-sectional study</i> —Not much impact for sampling was anticipated, so separate analytical approach to account for sampling strategy needed<br>(e) There is no sensitivity analyses |
| <b>Results</b>               |         |                                                                                                                                                                                                                                                                                                                                |
| Participants                 | 13*     | (a) All participants were eligible, no refusal, no missing data reported<br>(b) Not applicable<br>(c) Not necessary                                                                                                                                                                                                            |
| Descriptive data             | 14*     | (a) General characteristics of study participants given in Table 1<br>(b) No such data<br>(c) N/A                                                                                                                                                                                                                              |
| Outcome data                 | 15*     | <i>Cross-sectional study</i> —Summary measures reported                                                                                                                                                                                                                                                                        |
| Main results                 | 16      | (a) The main analysis did not include any confounding estimates<br>(b) Applicable description of variables given<br>(c) No relevant                                                                                                                                                                                            |
| Other analyses               | 17      | Report other analyses done—Graphical presentation given                                                                                                                                                                                                                                                                        |

**Discussion**

|                  |    |                                                                                  |
|------------------|----|----------------------------------------------------------------------------------|
| Key results      | 18 | Summarise key results given                                                      |
| Limitations      | 19 | Discuss limitations of the study: Discussed                                      |
| Interpretation   | 20 | Possible and cautious interpretation of overall results given                    |
| Generalisability | 21 | Discuss the generalisability (external validity) of the study results: Discussed |

**Other information**

|         |    |                                                                                                                                                                      |
|---------|----|----------------------------------------------------------------------------------------------------------------------------------------------------------------------|
| Funding | 22 | Give the source of funding and the role of the funders for the present study and, if applicable, for the original study on which the present article is based: Given |
|---------|----|----------------------------------------------------------------------------------------------------------------------------------------------------------------------|

\*Give information separately for cases and controls in case-control studies and, if applicable, for exposed and unexposed groups in cohort and cross-sectional studies.

**Note:** An Explanation and Elaboration article discusses each checklist item and gives methodological background and published examples of transparent reporting. The STROBE checklist is best used in conjunction with this article (freely available on the Web sites of PLoS Medicine at <http://www.plosmedicine.org/>, Annals of Internal Medicine at <http://www.annals.org/>, and Epidemiology at <http://www.epidem.com/>). Information on the STROBE Initiative is available at [www.strobe-statement.org](http://www.strobe-statement.org).

# BMJ Open

## Care seeking in tuberculosis: Results from a countrywide cluster randomized survey in Bangladesh

|                                 |                                                                                                                                                                                                                                                                                                                                                                                                                                                                                                                                                                                                                                                                                                                                                                                                                                                                                                                                                                                  |
|---------------------------------|----------------------------------------------------------------------------------------------------------------------------------------------------------------------------------------------------------------------------------------------------------------------------------------------------------------------------------------------------------------------------------------------------------------------------------------------------------------------------------------------------------------------------------------------------------------------------------------------------------------------------------------------------------------------------------------------------------------------------------------------------------------------------------------------------------------------------------------------------------------------------------------------------------------------------------------------------------------------------------|
| Journal:                        | <i>BMJ Open</i>                                                                                                                                                                                                                                                                                                                                                                                                                                                                                                                                                                                                                                                                                                                                                                                                                                                                                                                                                                  |
| Manuscript ID:                  | bmjopen-2013-004766.R1                                                                                                                                                                                                                                                                                                                                                                                                                                                                                                                                                                                                                                                                                                                                                                                                                                                                                                                                                           |
| Article Type:                   | Research                                                                                                                                                                                                                                                                                                                                                                                                                                                                                                                                                                                                                                                                                                                                                                                                                                                                                                                                                                         |
| Date Submitted by the Author:   | 22-Apr-2014                                                                                                                                                                                                                                                                                                                                                                                                                                                                                                                                                                                                                                                                                                                                                                                                                                                                                                                                                                      |
| Complete List of Authors:       | Hossain, Shahed; International Centre for Diarrhoeal Disease Research, Bangladesh (icddr,b), Centre for Equity and Health Systems<br>Zaman, K; International Centre for Diarrhoeal Disease Research, Bangladesh (icddr,b),<br>Quaiyum, Abdul; International Centre for Diarrhoeal Disease Research, Bangladesh (icddr,b),<br>Banu, Sayera; International Centre for Diarrhoeal Disease Research, Bangladesh (icddr,b),<br>Husain, Ashaque; National Tuberculosis Control Programme, Directorate General of Health Services<br>Islam, Akramul; BRAC, BRAC Health Programme<br>Borgdorff, Martien; Department of Clinical Epidemiology, Academic Medical Center, University of Amsterdam; Centre for Infection and Immunity<br>Amsterdam, Academic Medical Center, University of Amsterdam<br>van Leth, Frank; Department of Global Health, Academic Medical Centre, University of Amsterdam, Amsterdam Institute for Global Health and Development; KNCV Tuberculosis Foundation, |
| <b>Primary Subject Heading</b>: | Health services research                                                                                                                                                                                                                                                                                                                                                                                                                                                                                                                                                                                                                                                                                                                                                                                                                                                                                                                                                         |
| Secondary Subject Heading:      | Infectious diseases                                                                                                                                                                                                                                                                                                                                                                                                                                                                                                                                                                                                                                                                                                                                                                                                                                                                                                                                                              |
| Keywords:                       | Tuberculosis < INFECTIOUS DISEASES, Organisation of health services < HEALTH SERVICES ADMINISTRATION & MANAGEMENT, Care seeking , Informal provider, Bangladesh                                                                                                                                                                                                                                                                                                                                                                                                                                                                                                                                                                                                                                                                                                                                                                                                                  |
|                                 |                                                                                                                                                                                                                                                                                                                                                                                                                                                                                                                                                                                                                                                                                                                                                                                                                                                                                                                                                                                  |

SCHOLARONE™  
Manuscripts

1  
2  
3 **Care seeking in tuberculosis: Results from a countrywide cluster randomized survey in**  
4  
5 **Bangladesh**  
6

7  
8 Shahed Hossain<sup>1</sup>, K. Zaman<sup>1</sup>, Abdul Quaiyum<sup>1</sup> Sayera Banu<sup>1</sup>, Ashaque Husain<sup>2</sup>, Akramul  
9  
10 Islam<sup>3</sup>, Martien Borgdorff<sup>4,5,6</sup>, Frank van Leth<sup>7,8</sup>  
11

12  
13 <sup>1</sup>International Centre for Diarrhoeal Disease Research, Bangladesh (icddr,b), Dhaka, Bangladesh  
14

15  
16 <sup>2</sup>National TB Control Programme (NTP), DGHS, Dhaka, Bangladesh  
17

18  
19 <sup>3</sup>Health Programme, BRAC, Dhaka, Bangladesh  
20

21  
22 <sup>4</sup>Department of Clinical Epidemiology, Academic Medical Centre, University of Amsterdam,  
23  
24 Amsterdam, The Netherlands  
25

26  
27 <sup>5</sup>Centre for Infection and Immunity Amsterdam, Academic Medical Centre, University of  
28  
29 Amsterdam, The Netherlands  
30

31  
32 <sup>6</sup>Public Health Service, Amsterdam, The Netherlands  
33

34  
35 <sup>7</sup>Department of Global health, Academic Medical Centre, University of Amsterdam,  
36

37  
38 Amsterdam Institute for Global Health and Development, Amsterdam, The  
39

40  
41 Netherlands  
42

43  
44 <sup>8</sup>KNCV Tuberculosis Foundation, The Hague, The Netherlands  
45

46  
47  
48 Key words: Tuberculosis; Care seeking; Informal providers; Bangladesh  
49

1  
2  
3 Corresponding author:  
4

5 SHAHED HOSSAIN, MBBS, MSc  
6

7  
8 Associate Scientist, Centre for Equity and Health Systems (CEHS)  
9

10 icddr,b, Mohakhali, Dhaka-1212, Bangladesh  
11

12 Phone: 880-2-8812531  
13

14 Email: [shahed@icddr.org](mailto:shahed@icddr.org)  
15

16 Fax: 880 2 8823963  
17  
18

19 Word count: 2903 (excluding title page, abstract, Article summary, References, Tables and  
20  
21 Figures, acknowledgements, funding, contribution, competing interest, data sharing statement,  
22  
23 and ethics information)  
24  
25  
26  
27  
28  
29  
30  
31  
32  
33  
34  
35  
36  
37  
38  
39  
40  
41  
42  
43  
44  
45  
46  
47  
48  
49  
50  
51  
52  
53  
54  
55  
56  
57  
58  
59  
60



## ABSTRACT

Objectives: To explore systematically the care seeking trajectories of TB cases up to four subsequent places of care and to assess the type of services provided at each place.

Methods: Tuberculosis cases detected actively during 2007-09 national tuberculosis prevalence survey and passively under routine programme at the same period were interviewed by administering a standardized questionnaire. Care seeking and services provided up to four subsequent points were explored. Care seeking was further explored by categorizing the providers into formal, informal and 'self care' groups.

Results: A total 273 TB cases were included for this study, 33 (12.0%) were detected during survey and 240 (88.0%) from the TB registers. Out of the 118 passively detected cases who first sought care from informal provider, 52(44.1%) remained in the informal sector at second point of care. Similarly, out of 52, 17(32.7%) and out of 17, 5(29.4%) remained in the informal sector at third and fourth subsequent points of care respectively. All the 33 actively detected cases had "self care" at the first point, 27 (81.8 %) remained with "self care" up to the fourth point of care. Prescribing drugs (59%-99%) was the major type of care provided by the both formal and informal care providers at each point with limited to nonexistent practice of investigation or referrals.

Conclusions: Free TB services are still underutilized by TB cases and informal care givers remained the major care providers for such cases in Bangladesh. In order to improve case detection it is necessary that the NTP immediately take effective initiatives to engage all types of care providers, particularly informal providers who are the first point of care for majority of the TB suspects.

## ARTICLE SUMMARY

### Article focus

- Documented care seeking and types of management received by the persons with TB symptoms at subsequent places of care.

### Key messages

- Initial care seeking by passively or actively detected TB cases happened at the informal sector or was limited to self care.
- About a third to half of the passively detected TB cases and majority of the actively detected TB cases utilized informal provider or self care for subsequent rounds of care.
- Case management in the informal sector was restricted to prescribing any medications, and almost without any diagnostic investigations or referrals.

### Strengths and limitations of this study

- Included both actively and passively detected TB cases from all over the country and explored wide spectrum of care seeking.
- Clusters were selected from the rural or urban areas equally which might not reflect the underlying population distribution of the country.

## INTRODUCTION

Bangladesh has successfully implemented Directly Observed Treatment, short-course (DOTS), the World Health Organization (WHO) advocated tuberculosis (TB) control strategy since 1993. Since then, impressive case detection and cure rates were recorded under DOTS. However, from 2006 onwards, case notification became stagnant and even started to show a declining trend.[1,2] It is likely that a substantial number of cases are not notified under National Tuberculosis Programme (NTP), and are probably getting treatment from private sector or not receiving care at all.[3-5]

The current TB control strategy is based, amongst others, on passive case detection, which is influenced by many health system and patient factors. The awareness of a person of her symptoms, and intention to seek care influences care utilization.[6,7] Similarly, availability and access to anti-TB services, and providers' behaviour also influence care seeking practices and outcomes. [8,9] Care seeking therefore is an important determinant that influences not only the individual's disease status and its prognosis, but also reflects on the epidemiology of TB in a community.

Care givers play a crucial role in the care seeking pathway of individuals with symptoms of tuberculosis. In Bangladesh, health care services are provided by both formal and informal providers. Within the organization of TB-control in Bangladesh, formal providers are licensed medical practitioners (public or private) graduated from a medical college, or health workers (public or through Non-Governmental Organizations) approved by the NTP, who received training to suspect, examine and refer TB cases to initiate TB treatment at DOTS centres.

1  
2  
3 Informal providers are non-qualified private practitioners who are not licensed or did not receive  
4 any formal training (e.g. village doctors, paramedics, pharmacy persons).[10,11] However the  
5  
6  
7  
8 NTP acknowledges the important role of private sector providers including informal providers  
9  
10 and urged to involve them to achieve TB control objectives through a systematic public- private  
11  
12 mix (PPM) approach.  
13

14  
15  
16 Informal providers comprise 95% of the total health workers of Bangladesh. They are frequently  
17  
18 the point of first care for TB and other chronic conditions due to many conditions including ease  
19  
20 of access to their services. [4,12-15] However, case management within the informal sector  
21  
22 remains unpredictable, and outcomes are hardly ever known.[13,16,17]  
23  
24  
25  
26  
27

28  
29 With freely available DOTS services throughout the country, it was expected all persons  
30  
31 irrespective of socio economic status would access and utilize this service. However, recent  
32  
33 findings of the National TB prevalence survey 2007-2009 of Bangladesh revealed that, only 9%  
34  
35 actively identified TB cases were known to the NTP, [18] indicating the others were remaining  
36  
37 in the community either without treatment or getting treatment from elsewhere. The same survey  
38  
39 showed that care utilization from DOTS centres was mostly from higher socio economic position  
40  
41 (SEP), while prevalent TB cases were mainly seen on the lower SEP strata. SEP was assessed by  
42  
43 validated asset items for households and the actively identified cases from survey were compared  
44  
45 with passively detected cases under NTP over the identical SEP quartiles. Among the actively  
46  
47 detected cases 75.8% were from lower two quartiles, while among the passively TB cases more  
48  
49 than half, 57.1% were from uppermost two quartiles, 40.8% from the second quartile, and 2.1%  
50  
51 in the lowest quartile of the population. This distribution did not change after adjustments for  
52  
53  
54  
55  
56  
57  
58  
59  
60

1  
2  
3 other factors or interactions among them. [5, 18] These findings indicate that availability of a  
4  
5 service does not ensure its utilization, as it has also been observed in other sectors. [8]  
6  
7

8  
9 With inadequate or absent of initial care of TB cases fueling further transmission of the disease  
10  
11 in the general population, it is important to understand the care seeking pathway of the persons  
12  
13 with TB symptoms with respect to where care is initiated, and what action is taken by the care  
14  
15 provider at presentation of an individual with chronic cough (as a strong marker for possible  
16  
17 TB). The course of the disease is probably much determined at the point of first contact and in  
18  
19 the subsequent points.  
20  
21

22  
23 In this study we interviewed TB cases detected actively in a national TB prevalence survey, and  
24  
25 cases detected passively under routine programme conditions. The objective was to explore their  
26  
27 care seeking behavior up to four subsequent points of taking care. The study will identify areas  
28  
29 to target by NTP for improved implementation of its activities to increase case finding and  
30  
31 appropriate care.  
32  
33  
34  
35  
36  
37  
38  
39  
40  
41  
42  
43  
44  
45  
46  
47  
48  
49  
50  
51  
52  
53  
54  
55  
56  
57  
58  
59  
60

## METHODS AND MATERIALS

**Setting and Study population:** The study was embedded within the National TB prevalence survey, Bangladesh carried out throughout the country during 2007-2009. This was a cross sectional survey which included 40 randomly selected clusters.[18] Sub-districts were the primary sampling units which were selected proportional to population size. Nearly 52,000 adults ( $\geq 15$  years) were included for sputum examination and 33 new smear positive TB cases were identified. For this analysis, we interviewed all these 33 actively detected cases and included 6 controls per cluster. The controls were the most recent passively detected cases under treatment from the TB registers of the each of 40 clusters' DOTS centres. All the cases were new smear positive pulmonary TB cases, and were diagnosed by direct sputum smear microscopy as per NTP guidelines. The detail of methodology is described elsewhere.[18]

**Data collection:** Data were collected by interviewing all detected survey cases at their households. A standard questionnaire was administered by trained survey coordinators immediately after the diagnosis of a case in the survey. The initial questionnaire was translated into Bangla, pre tested, and revised to incorporate review comments from users and experts. The survey coordinators received one week training at the Dhaka project office. The training included **thorough** understanding of the components of the questionnaire, and interview techniques to obtain reliable answers. The particulars of the 240 NTP cases were obtained from the TB register at the cluster-specific DOTS centre, after which the persons were visited at their home for an interview. Informed written consent was taken from all participants. All completed questionnaires were checked for completeness and appropriateness by a supervisor, who also re-interviewed a number of cases from randomly selected clusters for cross checking.

1  
2  
3  
4  
5  
6  
7 This survey protocol along with the national TB prevalence survey was approved by the  
8  
9 institutional review board (IRB, FWA-00001468) of the International Centre for Diarrhoeal  
10  
11 Diseases Research, Bangladesh (icddr,b).  
12

13  
14 **Measurements:** The interviews provided information on the demographics, symptom profile of  
15  
16 the cases, Socio-Economic Position (SEP), care utilization pattern, and services received at each  
17  
18 point of care visited. The demographic data included age, sex, place of residence, levels of  
19  
20 education and occupation. SEP was assessed by asset estimation.[19] The symptom profile  
21  
22 recorded the symptoms presented at first care seeking. The care seeking data provided  
23  
24 information on where care was sought, in what order, and what measures were taken by the  
25  
26 providers at each point. The detail of socio economic data collection is described elsewhere.[5]  
27  
28  
29  
30

31  
32 **Statistical approach:** Data were analyzed using the statistical package Stata 12.0 (Stata Corp.,  
33  
34 U.S.A.). The initial general description provides the characteristics of the study population. Age,  
35  
36 education, occupation and symptoms variables were presented into natural sub groups. The asset  
37  
38 estimation was based on a set of assets the household possessed and a weight was allocated to  
39  
40 each generated through a principal component analysis.[20] We included items and methods as  
41  
42 standardized and followed by Bangladesh Demographic and Health Survey 2001.[20,21] The  
43  
44 SEP of the study population was divided into quartiles. Care seeking from first to fourth  
45  
46 subsequent points was explored. The types of providers were categorized as formal or informal  
47  
48 as described earlier. We added a group as “self care” to denote the use of any treatment obtained  
49  
50 outside the formal or informal health sector (eg. home remedies, self medication).  
51  
52  
53  
54  
55  
56  
57  
58  
59  
60

1  
2  
3 Measures taken at each point of care seeking were grouped in four categories. These were only  
4  
5 advices offered, investigations ordered and medications given, or referred for further  
6  
7 investigations. The care seeking and actions taken were reported by the patients at interview, we  
8  
9 did not verify them either by checking prescription or by any other methods. We focused our  
10  
11 analysis on the care seeking patterns of those cases who initiated their care seeking trajectory at  
12  
13 the informal care sector.  
14  
15  
16  
17  
18  
19  
20  
21  
22  
23  
24  
25  
26  
27  
28  
29  
30  
31  
32  
33  
34  
35  
36  
37  
38  
39  
40  
41  
42  
43  
44  
45  
46  
47  
48  
49  
50  
51  
52  
53  
54  
55  
56  
57  
58  
59  
60



## RESULTS

A total 273 TB cases were included for this study, 33 (12.0%) were detected during survey and 240 (88.0%) from the TB registers. Among the participants 120 (43.9%) were below 34 years of age, and 176 (64.5%) were male. Participants were almost equally from rural and urban areas. More than fifty percent of the cases presented with more than 5 symptoms. Most of the participants had cough, of which 81.3% for 15 days or more (Table 1). Among those, the mean delay from onset of symptoms to seek any care from any provider was 31 days, which was 20 days for survey cases , and 33 days for the NTP cases under NTP (not shown).

**Table 1: Socio demographic characteristics of NTP and survey tuberculosis cases**

| Characteristics           | All    |      | Survey cases |      | NTP cases |      | P value |
|---------------------------|--------|------|--------------|------|-----------|------|---------|
|                           | N(273) | %    | n(33)        | %    | n(240)    | %    |         |
| <b>Age in years</b>       |        |      |              |      |           |      |         |
| 15-34                     | 120    | 43.9 | 8            | 24.2 | 112       | 46.6 | 0.028   |
| 35-54                     | 87     | 31.9 | 12           | 36.6 | 75        | 31.2 |         |
| 55+                       | 66     | 25.0 | 13           | 39.9 | 53        | 22.1 |         |
| <b>Sex</b>                |        |      |              |      |           |      |         |
| Male                      | 176    | 64.5 | 24           | 72.7 | 152       | 63.3 | 0.290   |
| Female                    | 97     | 35.5 | 9            | 27.7 | 88        | 36.7 |         |
| <b>Residence</b>          |        |      |              |      |           |      |         |
| Rural                     | 140    | 51.3 | 20           | 60.6 | 120       | 50.0 | 0.253   |
| Urban                     | 133    | 48.7 | 13           | 39.4 | 120       | 50.0 |         |
| <b>Education</b>          |        |      |              |      |           |      |         |
| 0                         | 71     | 26.0 | 15           | 45.5 | 55        | 23.0 | 0.039   |
| 1-5                       | 71     | 26.0 | 8            | 24.2 | 65        | 27.1 |         |
| 6-10                      | 68     | 24.9 | 6            | 18.2 | 62        | 25.8 |         |
| 10+                       | 63     | 23.1 | 4            | 12.1 | 58        | 24.2 |         |
| <b>Occupation</b>         |        |      |              |      |           |      |         |
| Agri based                | 37     | 13.6 | 4            | 12.1 | 33        | 13.8 | 0.003   |
| Daily wagers              | 89     | 22.3 | 14           | 42.4 | 75        | 31.3 |         |
| Sales and services        | 115    | 28.2 | 6            | 18.2 | 109       | 45.4 |         |
| Others                    | 32     | 35.9 | 9            | 27.3 | 23        | 9.6  |         |
| <b>Asset Quartiles</b>    |        |      |              |      |           |      |         |
| 1 <sup>st</sup> (Lowest)  | 17     | 6.2  | 12           | 36.4 | 5         | 2.0  | 0.000   |
| 2 <sup>nd</sup>           | 111    | 40.6 | 13           | 39.4 | 98        | 41.0 |         |
| 3 <sup>rd</sup>           | 113    | 41.4 | 5            | 15.1 | 108       | 45.0 |         |
| 4 <sup>th</sup>           | 32     | 11.8 | 3            | 9.1  | 29        | 12.0 |         |
| <b>Presence of cough</b>  |        |      |              |      |           |      |         |
| Yes                       | 226    | 82.8 | 29           | 87.8 | 197       | 82.1 | 0.408   |
| No                        | 47     | 17.2 | 4            | 12.2 | 43        | 17.9 |         |
| <b>Duration of cough</b>  |        |      |              |      |           |      |         |
| Less than 14 days         | 51     | 18.7 | 6            | 18.2 | 45        | 18.2 | 0.937   |
| ≥ 15 days                 | 222    | 81.3 | 27           | 81.8 | 195       | 81.8 |         |
| <b>Number of symptoms</b> |        |      |              |      |           |      |         |
| ≤ 2                       | 44     | 16.1 | 4            | 12.1 | 40        | 16.7 | 0.556   |
| 3-4                       | 79     | 29.0 | 8            | 24.2 | 71        | 29.6 |         |
| 5+                        | 150    | 54.9 | 21           | 63.7 | 129       | 53.8 |         |

1  
2  
3 Among the 240 cases detected passively under NTP, 118 (49.1%) sought initial care from  
4 informal providers, 106 (44.2%) from formal providers, and 16 (6.7%) used self care. All of the  
5  
6 informal providers, 106 (44.2%) from formal providers, and 16 (6.7%) used self care. All of the  
7  
8 33 actively detected cases reported self care as the initial strategy, totaling this group to 49  
9  
10 (17.9%) of all cases (Fig 1). Out of the 118 passively detected NTP cases with initial care from  
11  
12 the informal sector, 52 (44.1%) remained in the informal sector, while 61 (51.7%) switched to a  
13  
14 formal provider for care at the second point care. Again, among the 52 who remained in the  
15  
16 informal care sector, at the third point of care 32 (61.5%) migrated to formal care sector, while  
17  
18 17 (32.7%) remained in the informal sector. The proportion of patient who remained in the  
19  
20 informal care sector up to the fourth point care was five (29.4%) of those stating their health  
21  
22 seeking behavior in the informal sector. (Fig 1). Among the 16 (6.7%) of the NTP cases who  
23  
24 reported self care as their initial strategy ultimately four (25.0%) remained in this stage up to  
25  
26 fourth point of care, three (18.8 %) moved to informal sector and nine (56.2%) migrated to  
27  
28 formal care sector subsequently. Among the active detected cases, all of whom had self care as  
29  
30 the initial strategy, 27 (81.8%) remained at this stage before being detected by the survey.  
31  
32  
33 Among the remaining six, three shifted to the formal sector at the second point of care, while the  
34  
35 other three switched between informal and formal providers in the subsequent points of care (Not  
36  
37 shown).  
38  
39  
40  
41  
42  
43

44 We looked into measures taken at each point of care by the formal and informal providers. In the  
45  
46 formal care sector, the primary action was to prescribe drugs at each point of care starting with  
47  
48 79 (74.5%) at first point, 43 (70.5%) at the second point, 19 (59.4%) at the third and 10 (91%) at  
49  
50 the fourth point of care. Ordering diagnostic investigations varied from 19 (17.9%) at the first  
51  
52 point of care, to 14 (22.9%) at the second, 10 (31.2%) at the third, and 1 (9.0%) at the fourth  
53  
54 point of care. Referral for further investigation was seldom done (0-2%). The informal providers  
55  
56  
57  
58  
59  
60

1  
2  
3 on the other hand, prescribed drugs in 80% to 99% of the encounters, and seldom ordered  
4  
5 diagnostic investigations or referred the individual for further investigations at any of the four  
6  
7 points of care. (Fig 2).  
8  
9

10  
11 The reasons for not seeking care at all were available only from the 33 survey cases. The major  
12  
13 reasons were not considering symptoms serious enough, and monetary constraints.  
14  
15  
16  
17  
18  
19  
20  
21  
22  
23  
24  
25  
26  
27  
28  
29  
30  
31  
32  
33  
34  
35  
36  
37  
38  
39  
40  
41  
42  
43  
44  
45  
46  
47  
48  
49  
50  
51  
52  
53  
54  
55  
56  
57  
58  
59  
60

## DISCUSSION

Our study showed that most of the initial care seeking by passively identified TB cases happened at the informal sector or was limited to self care. At each following round of care seeking a third to a half remained in the informal care sector. Among actively detected cases, more than 80% remained in the self care sector up to the time of their identification by the survey. Case management in the informal sector was restricted to prescribing any medications, with non existence of any diagnostic investigations or referrals.

Preference for informal providers as initial place of care has been reported from Bangladesh and elsewhere.[3-5,9,12] In chronic conditions where the symptoms onset is slow and insidious like tuberculosis, people usually consult with an informal provider available at hand or consume over the counter drugs. This behavior can cause a marked delay to starting appropriate TB medication, given the fact that TB medication in line with the NP guideline is seldom present in the informal health sector. This has been observed in earlier studies from Bangladesh.[4] Our study adds the important finding that this preference of the informal sector persists throughout the care seeking trajectory. The lack of (referral for) diagnostic investigation can cause additional systems delay (between care seeking and starting appropriate treatment). An earlier study reported that this type of delay could be more than ten weeks.[4] Delay to reach appropriate care and treatment impacts on the course of the disease and may result in unfavorable outcomes and ongoing transmission.[22] From a programmatic point of view, this situation leads to a marked under reporting of TB cases.

Care seeking from the informal sector is not limited to TB only, but rather a common feature for all chronic conditions in Bangladesh.[15,23] It is suggested that the presence of huge numbers of

1  
2  
3 informal providers in both rural and urban areas, their easy accessibility due to reduced cost, and  
4  
5 minimal levels of stigma when attending such providers, encourage people to seek care from this  
6  
7 sector first.[15,23,24] A good portion of them are simple drug sellers providing drugs without  
8  
9 further diagnostic procedures.[12] This easy access to informal providers stimulates “shopping  
10  
11 for care”, when care is sought from informal providers subsequently one after one, as observed  
12  
13 in our study. In Malawi, care seeking among TB patients noted that multiple contacts in range  
14  
15 of 1-15 were made before the diagnosis.[25] Similarly in Vietnam patients made on average 1.3  
16  
17 contacts and 2.5 visits per providers before getting appropriate TB services, even though the size  
18  
19 private sector was very small.[26]  
20  
21  
22  
23  
24

25 We observed that the case management was not altogether different in the formal and informal  
26  
27 sector with respect to prescribing drugs. However, unlike in the formal sector, there was almost  
28  
29 a complete absence of diagnostic procedures and referrals in the informal sector. We need to  
30  
31 carefully interpret these findings as we don't have information what drugs were prescribed by the  
32  
33 providers. Retrospective recording of actual drugs through patient interviews is difficult and in  
34  
35 most cases unreliable. In Bangladesh, Fixed Dose Combination (FDC) anti TB drugs are almost  
36  
37 exclusively available at DOTS centres. This implies that medication provided through the  
38  
39 informal sector is unlikely to be adequate for the management of TB. But formal providers can  
40  
41 manage TB cases outside the context of DOTS centers. As such mismanagement of TB can also  
42  
43 occur in the formal sector, given the low occurrence of diagnostic investigations.  
44  
45  
46  
47  
48

49 A study in Malawi provided insight in the type of medication provided to individuals with TB  
50  
51 symptoms but without a formal diagnosis. The authors reported that 61% of cases had been  
52  
53 treated with antibiotics like co-trimoxazole, doxycycline, and penicillin.[25]  
54  
55  
56  
57  
58  
59  
60

1  
2  
3 NTP also recognizes the absence of standard practices in the private sector and the lack of  
4  
5 sufficient interaction and formal linkages between NTP and these private sector providers. The  
6  
7 lessons learnt from studies aimed at establishing connections between formal and informal health  
8  
9 care providers remain unexplored.[13,27] Our study indicates that despite the country coverage  
10  
11 by DOTS, and public-private-partnership activities undertaken by the NTP, the impact did not  
12  
13 result in reducing the disconnect between NTP and the informal health sector. In a recent attempt  
14  
15 to improve the situation, NTP in partnership with icddr,b and United States Agency for  
16  
17 International Development (USAID) is implementing a “Translating research into action  
18  
19 (TRAction)” project to test different implementation strategies, with a clear role for the informal  
20  
21 providers. This current study suggests that attempt is timely and needed.  
22  
23  
24  
25  
26

27  
28 One of the potential limitations of the study is the potential for minor selection bias. Although all  
29  
30 participants were randomly selected, the selection of clusters was not stratified by urban/rural  
31  
32 setting. The study sample therefore does not fully represent the 70% of the rural population in  
33  
34 Bangladesh. There was also a slight overrepresentation of males. However the national case  
35  
36 notification is more or less static at 3:1 male to female since the inception of DOTS in 1993.[1]  
37  
38 The strengths of the study are that the cases were interviewed at home by trained research  
39  
40 coordinators providing an enabling study setting. We explored the care seeking of both actively  
41  
42 and passively detected cases which would cover care seeking from a wider perspective of two  
43  
44 different kinds of cases, one who is probably in the early phase of the disease process and the  
45  
46 other probably in a more advanced condition. Moreover we have covered the care seeking up to  
47  
48 fourth point of care, which is expected to give a more comprehensive picture of the care seeking  
49  
50 by the TB cases in Bangladesh.  
51  
52  
53  
54  
55  
56  
57  
58  
59  
60

1  
2  
3 In conclusions it can be said that most of the initial care seeking by different types of TB cases  
4 was sought from informal providers or was limited to self care, and that a large proportion of  
5 these cases remained in the informal sector during subsequent care seeking. It is imperative that  
6 the NTP should immediately take initiatives to engage all types of care providers, particularly the  
7 informal providers. It is also necessary to strengthen the ongoing advocacy communication and  
8 social mobilization (ACSM) activities to increase awareness on key TB symptoms, availability  
9 of diagnosis and free treatment in an attempt to stimulate appropriate care seeking, and to  
10 prevent unnecessary delay in TB case management.  
11  
12  
13  
14  
15  
16  
17  
18  
19  
20  
21  
22  
23  
24  
25  
26  
27  
28  
29  
30  
31  
32  
33  
34  
35  
36  
37  
38  
39  
40  
41  
42  
43  
44  
45  
46  
47  
48  
49  
50  
51  
52  
53  
54  
55  
56  
57  
58  
59  
60



## Acknowledgements

We thankfully acknowledge National Tuberculosis Control Programme (NTP) of Bangladesh for their continuous support throughout this study. We also acknowledge the technical assistance provided by KNCV Tuberculosis Foundation, The Netherlands. Our thanks go to all NTP partners like BRAC, Damien Foundation and others and individuals involved in this survey for their support throughout the study period. We sincerely acknowledge the contribution of our project staff and community members from all over the country, without whom this study would never have been materialized.

**Contributors** Shahed Hossain was responsible for conception and design of the study, analysis and interpretation of data and writing the manuscript. Martien Borgdorff, Frank van Leth and K Zaman participated in the conception and design of the study, analysis and interpretation of data as well as revising the draft. Abdul Quaiyum, Sayera Banu, Ashaque Husain and Akramul Islam participated in the analysis and interpretation of data and substantially revising the paper.

**Funding** This research study was funded by World Health Organization (WHO), United States Agency for International Development (USAID) and Global Fund to Fight AIDS, Tuberculosis and Malaria (GFATM), grant number SEBAN TUB 001 XW06U. icddr,b acknowledges with gratitude the commitment of WHO, USAID and GFATM to its research efforts.

The funders had no role in the study design, data collection and analysis, decision to publish or preparation of the manuscript.

**Competing interest:** None

1  
2  
3  
4 **Ethics approval** This study was approved through an Institutional Review Board of icddr,b  
5  
6 (IRB, FWA-00001468) which is internationally accorded and participated by members from  
7  
8 international and national experts. Verbal and written consent was obtained in all cases after  
9  
10 informed appraisal.  
11  
12

13  
14 **Data sharing statement** Additional data from this survey are being analyzed and will be  
15  
16 published in future  
17  
18  
19  
20  
21  
22  
23  
24  
25  
26  
27  
28  
29  
30  
31  
32  
33  
34  
35  
36  
37  
38  
39  
40  
41  
42  
43  
44  
45  
46  
47  
48  
49  
50  
51  
52  
53  
54  
55  
56  
57  
58  
59  
60

## REFERENCES

1. World Health Organization. *Global Tuberculosis Report 2013*. World Health Organization, Geneva. WHO/HTM/TB/2013.11
2. Directorate General of Health Services (DGHS). *Tuberculosis in Bangladesh: Annual Report 2012*. National Tuberculosis Control Programme (NTP), Dhaka.
3. Zafar Ullah AN, Haque R, Begum V, *et al*. Public Private Partnership for TB control in Bangladesh: role of medical practitioners in management of TB patients. *World Medical & Health Policy* 2010; 2:217-34.
4. Rifat M, Rusen ID, Islam MDA, *et al*. Why are tuberculosis patients not treated earlier? A study of informal health practitioners in Bangladesh. *Int J Tuberc Lung Dis* 2011;15:647-51.
5. Hossain S, Quaiyum MA, Zaman K, *et al*. Socio Economic Position in TB Prevalence and Access to Services: Results from a Population Prevalence Survey and a Facility-Based Survey in Bangladesh. *PLoS ONE* 2012; 7:1-8. <http://www.plosone.org/article/info:doi/10.1371/journal.pone.0044980> (Accessed: 5 August 2013).
6. Rieder H. Case finding in Tuberculosis: a comprehensive international approach. In: L. Reichman & E. Hershfield (eds). Marcel Dekker Inc, New York, 1993;167-182.
7. Pinto LM, Udwardia ZF. Private patients' apperceptions about a public programme; what do private Indian tuberculosis patients really feel about directly observed treatment? *BMC Public Health* 2010; 10 (357);1-5. <http://www.biomedcentral.com/1471-2458/10/357> (Accessed: 5 August 2013).
8. Gwatkin DR, Bhuiya A, Victora CG. Making Health Systems more Equitable. *Lancet*, 2004;364,1273-80.

- 1  
2  
3 9. Yimer S, Holm-Hansen C, Yimaldu T, *et al.* Health care seeking among pulmonary  
4 tuberculosis suspects and patients in rural Ethiopia: a community-based study. *BMC Public*  
5  
6 *Health* 2009; 9(454):1-9. <http://www.biomedcentral.com/1471-2458/9/454> (Accessed: 5  
7  
8 August 2013).  
9  
10
- 11  
12 10. Ahmed SM, Evans TG, Standing H, *et al.* Bangladesh: Innovation for Universal Health  
13 Coverage 2: Harnessing pluralism for better health in Bangladesh. *Lancet* 2013; 382: 1746–  
14  
15 55.  
16  
17
- 18  
19 11. Director General of Health Services (DGHS). *National TB guidelines 2009*, Fourth edition,  
20  
21 2009; Ministry of Health and Family Welfare, Government of Bangladesh.  
22  
23
- 24  
25 12. Hossain S, Larson CP, Quaiyum MA, *et al.* Adults with chronic cough in urban Bangladesh:  
26  
27 healthcare utilization and management of cases by private practitioners. *World Health &*  
28  
29 *Population* 2010;12:5-17.  
30  
31
- 32  
33 13. Zafar Ullah AN, Huque R, Husain A, *et al.* Effectiveness of involving the private medical  
34  
35 sector in the National TB Control Programme in Bangladesh: evidence from mixed  
36  
37 methods. *BMJ Open* 2012;2(6):1-8. <http://bmjopen.bmj.com/content/2/6/e001534.long>  
38  
39 (Accessed: 5 August, 2013).  
40
- 41  
42 14. Ahmed SM, Hossain MA. Mapping of the health care providers in Bangladesh. In: James P  
43  
44 Grant School of Public Health, Health Workforce in Bangladesh: Who constitutes the  
45  
46 healthcare system? The state of health in Bangladesh 2007, *Bangladesh Health Watch 2007*.  
47  
48 BRAC University, Dhaka.2008.  
49
- 50  
51 15. Desmet M, Bashir I, Sohel N. Illness profile and health care utilization patterns of slum  
52  
53 residence in Dhaka city, Bangladesh. Health care seeking studies. International Centre for  
54  
55  
56  
57  
58  
59  
60

- 1  
2  
3 Diarrhoeal Disease research, Bangladesh (ICDDR,B): Dhaka. *ICDDR,B Working Paper*  
4  
5 *No.111*. 1998;128-132.  
6  
7
- 8 16. World Health Organization. Involving private practitioners in tuberculosis control: Issues,  
9  
10 interventions, and emerging policy framework. World Health Organization, Geneva 2001;  
11  
12 WHO/CDS/TB/2001.285.  
13  
14
- 15 17. Malmborg R, Mann G, Thomson R, *et al*. Can Public-private collaboration promote  
16  
17 tuberculosis case detection among the poor and vulnerable? *Bulletin of the World Health*  
18  
19 *Organization* 2006;84:752-58  
20  
21
- 22 18. Zaman K, Hossain S, Banu S, *et al*. Prevalence of smear positive tuberculosis in persons  
23  
24 aged  $\geq 15$  years in Bangladesh: results from a national survey 2007-2009. *Epidemiology*  
25  
26 *and Infection* 2012;140:1018-27.  
27  
28
- 29 19. van Leth F, Guilatco RS, Hossain S, *et al*. Measuring socio economic data in tuberculosis  
30  
31 prevalence surveys. *Int J Tuberc Lung Dis* 2011;15: 558-63.  
32  
33
- 34 20. Gwatkin DR, Rutstein S, Johnson K, *et al*. Country reports on HNP and Poverty. *Socio-*  
35  
36 *Economic Differences in Health, Nutrition and Population. Bangladesh: 1996/97,*  
37  
38 *1999/2000, 2004*. Washington, DC, World Bank, Human Development Network, Health,  
39  
40 Nutrition and Population.  
41  
42
- 43 21. Bangladesh Demographic and health Survey 1999-2000. National Institute of population,  
44  
45 Research and Training (NIPORT), Mitra and Associates, Measure DHS+, ORC Macro,  
46  
47 Calverton, Maryland, USA. 2001.  
48  
49
- 50 22. Jianzhao H, van den Hof S, Lin X, *et al*. Risk factors for non-cure among new sputum smear  
51  
52 positive tuberculosis patients treated in tuberculosis dispensaries in Yunnan, China. *BMC*  
53  
54  
55  
56  
57  
58  
59  
60

1  
2  
3 *Health Services Research* 201;1: 97.<http://www.biomedcentral.com/1472-6963/11/97>

4  
5  
6 (Accessed: August 7, 2013).

- 7  
8 23. Ahmed SM. *Exploring health-seeking behaviour of disadvantaged populations in rural*  
9  
10 *Bangladesh*. PhD Thesis. Karolinska Institutet. Stockholm 2005.
- 11  
12 24. Ahmed SM, Hossain MA, Chowdhury MR. Informal sector providers in Bangladesh: how  
13  
14 equipped are they to provide rational health care? *Health Policy and Planning* 2009;24,467–  
15  
16 78.
- 17  
18 25. Salaniponi FML, Harries AD, Banda HT, *et al.* Care seeking behaviour and diagnostic  
19  
20 processes in patients with smear-positive pulmonary tuberculosis in Malawi. *Int J Tuberc*  
21  
22 *Lung Dis* 2000;4:327-32.
- 23  
24 26. Lonroth K, Thuong LM, Linh PD, *et al.* Utilization of private and public health care  
25  
26 providers for tuberculosis symptoms in Ho Chi Minh city, Vietnam. *Health Policy and*  
27  
28 *Planning* 2001;16:47-54.
- 29  
30 27. Salim HMA, Uplekar M, Daru P, *et al.* Turning liabilities into resources: Informal village  
31  
32 doctors and tuberculosis control in Bangladesh. *Bulletin of World Health Organization*  
33  
34 2006;84:479-84.
- 35  
36  
37  
38  
39  
40  
41  
42  
43  
44  
45  
46  
47  
48  
49  
50  
51  
52  
53  
54  
55  
56  
57  
58  
59  
60

1  
2  
3  
4  
5  
6  
7  
8  
9  
10  
11  
12  
13  
14  
15  
16  
17  
18  
19  
20  
21  
22  
23  
24  
25  
26  
27  
28  
29  
30  
31  
32  
33  
34  
35  
36  
37  
38  
39  
40  
41  
42  
43  
44  
45  
46  
47  
48  
49  
50  
51  
52  
53  
54  
55  
56  
57  
58  
59  
60

**Figure legends**

**Fig 1: Care seeking at different points of care**

**Fig 2: Actions taken if care sought from formal and informal providers**

For peer review only

1  
2  
3 **Care seeking in tuberculosis: Results from a countrywide cluster randomized survey in**  
4  
5 **Bangladesh**

6  
7  
8 Shahed Hossain<sup>1</sup>, K. Zaman<sup>1</sup>, Abdul Quaiyum<sup>1</sup> Sayera Banu<sup>1</sup>, Ashaque Husain<sup>2</sup>, Akramul  
9  
10 Islam<sup>3</sup>, Martien Borgdorff<sup>4,5,6</sup>, Frank van Leth<sup>7,8</sup>

11  
12  
13 <sup>1</sup>International Centre for Diarrhoeal Disease Research, Bangladesh (icddr,b), Dhaka, Bangladesh

14  
15  
16 <sup>2</sup>National TB Control Programme (NTP), DGHS, Dhaka, Bangladesh

17  
18  
19 <sup>3</sup>Health Programme, BRAC, Dhaka, Bangladesh

20  
21  
22 <sup>4</sup>Department of Clinical Epidemiology, Academic Medical Centre, University of Amsterdam,  
23  
24  
25  
26  
27  
28 Amsterdam, The Netherlands

29  
30  
31 <sup>5</sup>Centre for Infection and Immunity Amsterdam, Academic Medical Centre, University of  
32  
33  
34  
35  
36  
37  
38 Amsterdam, The Netherlands

39  
40  
41 <sup>6</sup>Public Health Service, Amsterdam, The Netherlands

42  
43  
44 <sup>7</sup>Department of Global health, Academic Medical Centre, University of Amsterdam,  
45  
46  
47  
48  
49  
50  
51  
52  
53  
54  
55  
56  
57  
58  
59  
60  
Amsterdam Institute for Global Health and Development, Amsterdam, The  
Netherlands

<sup>8</sup>KNCV Tuberculosis Foundation, The Hague, The Netherlands

Key words: Tuberculosis; Care seeking; Informal providers; Bangladesh



1  
2  
3 Corresponding author:  
4

5 SHAHED HOSSAIN, MBBS, MSc  
6

7  
8 Associate Scientist, Centre for Equity and Health Systems (CEHS)  
9

10 icddr,b, Mohakhali, Dhaka-1212, Bangladesh  
11

12 Phone: 880-2-8812531  
13

14 Email: [shahed@icddr.org](mailto:shahed@icddr.org)  
15

16 Fax: 880 2 8823963  
17  
18

19 Word count: 2903 (excluding title page, abstract, Article summary, References, Tables and  
20  
21 Figures, acknowledgements, funding, contribution, competing interest, data sharing statement,  
22  
23 and ethics information)  
24  
25  
26  
27  
28  
29  
30  
31  
32  
33  
34  
35  
36  
37  
38  
39  
40  
41  
42  
43  
44  
45  
46  
47  
48  
49  
50  
51  
52  
53  
54  
55  
56  
57  
58  
59  
60

## ABSTRACT

Objectives: To explore systematically the care seeking trajectories of TB cases up to four subsequent places of care and to assess the type of services provided at each place.

Methods: Tuberculosis cases detected actively during 2007-09 national tuberculosis prevalence survey and passively under routine programme at the same period were interviewed by administering a standardized questionnaire. Care seeking and services provided up to four subsequent points were explored. Care seeking was further explored by categorizing the providers into formal, informal and 'self care' groups.

Results: A total 273 TB cases were included for this study, 33 (12.0%) were detected during survey and 240 (88.0%) from the TB registers. **Out of the 118 passively detected cases who first sought care from informal provider, 52(44.1%) remained in the informal sector at second point of care. Similarly, out of 52, 17(32.7%) and out of 17, 5(29.4%) remained in the informal sector at third and fourth subsequent points of care respectively.** All the 33 actively detected cases had "self care" at the first point, 27 (81.8 %) remained with "self care" up to the fourth point of care. Prescribing drugs (59%-99%) was the major type of care provided by the both formal and informal care providers at each point with limited to nonexistent practice of investigation or referrals.

Conclusions: Free TB services are still underutilized by TB cases and informal care givers remained the major care providers for such cases in Bangladesh. In order to improve case detection it is necessary that the NTP immediately take effective initiatives to engage all types of care providers, particularly informal providers who are the first point of care for majority of the TB suspects.

## ARTICLE SUMMARY

### Article focus

- Documented care seeking and types of management received by the persons with TB symptoms at subsequent places of care.

### Key messages

- Initial care seeking by passively or actively detected TB cases happened at the informal sector or was limited to self care.
- About a third to half of the passively detected TB cases and majority of the actively detected TB cases utilized informal provider or self care for subsequent rounds of care.
- Case management in the informal sector was restricted to prescribing any medications, and almost without any diagnostic investigations or referrals.

### Strengths and limitations of this study

- Included both actively and passively detected TB cases from all over the country and explored wide spectrum of care seeking.
- Clusters were selected from the rural or urban areas equally which might not reflect the underlying population distribution of the country.

## INTRODUCTION

Bangladesh has successfully implemented Directly Observed Treatment, short-course (DOTS), the World Health Organization (WHO) advocated tuberculosis (TB) control strategy since 1993. **Since then, impressive case detection and cure rates were recorded under DOTS. However, from 2006 onwards, case notification became stagnant and even started to show a declining trend.**[1,2] It is likely that a **substantial number of cases are not notified under National Tuberculosis Programme (NTP), and are probably getting treatment from private sector or not receiving care at all.**[3-5]

The current TB control strategy is based, amongst others, on passive case detection, which is influenced by many health system and patient factors. The awareness of a person of her symptoms, and intention to seek care influences care utilization.[6,7] **Similarly, availability and access to anti-TB services, and providers' behaviour also influence care seeking practices and outcomes.** [8,9] Care seeking therefore is an important determinant that influences not only the individual's disease status and its prognosis, but also reflects on the epidemiology of TB in a community.

Care givers play a crucial role in the care seeking pathway of individuals with symptoms of tuberculosis. **In Bangladesh, health care services are provided by both formal and informal providers.** Within the organization of TB-control in Bangladesh, formal providers are licensed medical practitioners (public or private) graduated from a medical college, or health workers (public or through Non-Governmental Organizations) approved by the NTP, who received training to suspect, examine and refer TB cases to initiate TB treatment at DOTS centres.

1  
2  
3 Informal providers are non-qualified private practitioners who are not licensed or did not receive  
4 any formal training (e.g. village doctors, paramedics, pharmacy persons).[10,11] **However the**  
5  
6  
7  
8 **NTP acknowledges the important role of private sector providers including informal**  
9  
10 **providers and urged to involve them to achieve TB control objectives through a systematic**  
11 **public- private mix (PPM) approach.**  
12

13  
14  
15 Informal providers comprise 95% of the total health workers of Bangladesh. They are frequently  
16 the point of first care for TB and other chronic conditions due to many conditions including ease  
17 of access to their services. [4,12-15] However, case management within the informal sector  
18 remains unpredictable, and outcomes are hardly ever known.[13,16,17]  
19  
20  
21  
22  
23  
24  
25  
26  
27

28  
29 With freely available DOTS services throughout the country, it was expected all persons  
30 irrespective of socio economic status would access and utilize this service. However, recent  
31 findings of the National TB prevalence survey 2007-2009 of Bangladesh revealed that, only 9%  
32 actively identified TB cases were known to the NTP, [18] indicating the others were remaining  
33 in the community either without treatment or getting treatment from elsewhere. **The same**  
34 **survey showed that care utilization from DOTS centres was mostly from higher socio**  
35 **economic position (SEP), while prevalent TB cases were mainly seen on the lower SEP**  
36 **strata. SEP was assessed by validated asset items for households and the actively identified**  
37 **cases from survey were compared with passively detected cases under NTP over the**  
38 **identical SEP quartiles. Among the actively detected cases 75.8% were from lower two**  
39 **quartiles, while among the passively TB cases more than half, 57.1% were from uppermost**  
40 **two quartiles, 40.8% from the second quartile, and 2.1% in the lowest quartile of the**  
41 **population. This distribution did not change after adjustments for other factors or**  
42  
43  
44  
45  
46  
47  
48  
49  
50  
51  
52  
53  
54  
55  
56  
57  
58  
59  
60

1  
2  
3 **interactions among them. [5, 18] These findings indicate that availability of a service does**  
4  
5 **not ensure its utilization, as it has also been observed in other sectors. [8]**  
6  
7

8  
9 With inadequate or absent of initial care of TB cases fueling further transmission of the disease  
10  
11 in the general population, it is important to understand the care seeking pathway of the persons  
12  
13 with TB symptoms with respect to where care is initiated, and what action is taken by the care  
14  
15 provider at presentation of an individual with chronic cough (as a strong marker for possible  
16  
17 TB). The course of the disease is probably much determined at the point of first contact and in  
18  
19 the subsequent points.  
20  
21

22  
23 In this study we interviewed TB cases detected actively in a national TB prevalence survey, and  
24  
25 cases detected passively under routine programme conditions. The objective was to explore their  
26  
27 care seeking behavior up to four subsequent points of taking care. The study will identify areas  
28  
29 to target by NTP for improved implementation of its activities to increase case finding and  
30  
31 appropriate care.  
32  
33  
34  
35  
36  
37  
38  
39  
40  
41  
42  
43  
44  
45  
46  
47  
48  
49  
50  
51  
52  
53  
54  
55  
56  
57  
58  
59  
60

## METHODS AND MATERIALS

**Setting and Study population:** The study was embedded within the National TB prevalence survey, Bangladesh carried out throughout the country during 2007-2009. This was a cross sectional survey which included 40 randomly selected clusters.[18] Sub-districts were the primary sampling units which were selected proportional to population size. Nearly 52,000 adults ( $\geq 15$  years) were included for sputum examination and 33 new smear positive TB cases were identified. For this analysis, we interviewed all these 33 actively detected cases and included 6 controls per cluster. The controls were the most recent passively detected cases under treatment from the TB registers of the each of 40 clusters' DOTS centres. All the cases were new smear positive pulmonary TB cases, and were diagnosed by direct sputum smear microscopy as per NTP guidelines. The detail of methodology is described elsewhere.[18]

**Data collection:** Data were collected by interviewing all detected survey cases at their households. A standard questionnaire was administered by trained survey coordinators immediately after the diagnosis of a case in the survey. The initial questionnaire was translated into Bangla, pre tested, and revised to incorporate review comments from users and experts. The survey coordinators received one week training at the Dhaka project office. The training included **thorough** understanding of the components of the questionnaire, and interview techniques to obtain reliable answers. The particulars of the 240 NTP cases were obtained from the TB register at the cluster-specific DOTS centre, after which the persons were visited at their home for an interview. Informed written consent was taken from all participants. All completed questionnaires were checked for completeness and appropriateness by a supervisor, who also re-interviewed a number of cases from randomly selected clusters for cross checking.

1  
2  
3  
4  
5  
6  
7 **This survey protocol along with the national TB prevalence survey was approved by the**  
8 **institutional review board (IRB, FWA-00001468) of the International Centre for**  
9 **Diarrhoeal Diseases Research, Bangladesh (icddr,b).**  
10  
11  
12

13  
14 **Measurements:** The interviews provided information on the demographics, symptom profile of  
15 the cases, Socio-Economic Position (SEP), care utilization pattern, and services received at each  
16 point of care visited. The demographic data included age, sex, place of residence, levels of  
17 education and occupation. SEP was assessed by asset estimation.[19] The symptom profile  
18 recorded the symptoms presented at first care seeking. The care seeking data provided  
19 information on where care was sought, in what order, and what measures were taken by the  
20 providers at each point. The detail of socio economic data collection is described elsewhere.[5]  
21  
22  
23  
24  
25  
26  
27  
28  
29  
30

31  
32 **Statistical approach:** Data were analyzed using the statistical package Stata 12.0 (Stata Corp.,  
33 U.S.A.). The initial general description provides the characteristics of the study population. Age,  
34 education, occupation and symptoms variables were presented into natural sub groups. The asset  
35 estimation was based on a set of assets the household possessed and a weight was allocated to  
36 each generated through a principal component analysis.[20] We included items and methods as  
37 standardized and followed by Bangladesh Demographic and Health Survey 2001.[20,21] The  
38 SEP of the study population was divided into quartiles. Care seeking from first to fourth  
39 subsequent points was explored. The types of providers were categorized as formal or informal  
40 as described earlier. We added a group as “self care” to denote the use of any treatment obtained  
41 outside the formal or informal health sector (eg. home remedies, self medication).  
42  
43  
44  
45  
46  
47  
48  
49  
50  
51  
52  
53  
54  
55  
56  
57  
58  
59  
60



1  
2  
3 Measures taken at each point of care seeking were grouped in four categories. These were only  
4  
5 advices offered, investigations ordered and medications given, or referred for further  
6  
7 investigations. The care seeking and actions taken were reported by the patients at interview, we  
8  
9 did not verify them either by checking prescription or by any other methods. We focused our  
10  
11 analysis on the care seeking patterns of those cases who initiated their care seeking trajectory at  
12  
13 the informal care sector.  
14  
15  
16  
17  
18  
19  
20  
21  
22  
23  
24  
25  
26  
27  
28  
29  
30  
31  
32  
33  
34  
35  
36  
37  
38  
39  
40  
41  
42  
43  
44  
45  
46  
47  
48  
49  
50  
51  
52  
53  
54  
55  
56  
57  
58  
59  
60

For peer review only

## RESULTS

A total 273 TB cases were included for this study, 33 (12.0%) were detected during survey and 240 (88.0%) from the TB registers. Among the participants 120 (43.9%) were below 34 years of age, and 176 (64.5%) were male. Participants were almost equally from rural and urban areas. More than fifty percent of the cases presented with more than 5 symptoms. Most of the participants had cough, of which 81.3% for 15 days or more (Table 1). Among those, the mean delay from onset of symptoms to seek any care from any provider was 31 days, which was 20 days for survey cases , and 33 days for the NTP cases under NTP (not shown).

**Table 1: Socio demographic characteristics of NTP and survey tuberculosis cases**

| Characteristics           | All    |      | Survey cases |      | NTP cases |      | P value |
|---------------------------|--------|------|--------------|------|-----------|------|---------|
|                           | N(273) | %    | n(33)        | %    | n(240)    | %    |         |
| <b>Age in years</b>       |        |      |              |      |           |      |         |
| 15-34                     | 120    | 43.9 | 8            | 24.2 | 112       | 46.6 | 0.028   |
| 35-54                     | 87     | 31.9 | 12           | 36.6 | 75        | 31.2 |         |
| 55+                       | 66     | 25.0 | 13           | 39.9 | 53        | 22.1 |         |
| <b>Sex</b>                |        |      |              |      |           |      |         |
| Male                      | 176    | 64.5 | 24           | 72.7 | 152       | 63.3 | 0.290   |
| Female                    | 97     | 35.5 | 9            | 27.7 | 88        | 36.7 |         |
| <b>Residence</b>          |        |      |              |      |           |      |         |
| Rural                     | 140    | 51.3 | 20           | 60.6 | 120       | 50.0 | 0.253   |
| Urban                     | 133    | 48.7 | 13           | 39.4 | 120       | 50.0 |         |
| <b>Education</b>          |        |      |              |      |           |      |         |
| 0                         | 71     | 26.0 | 15           | 45.5 | 55        | 23.0 | 0.039   |
| 1-5                       | 71     | 26.0 | 8            | 24.2 | 65        | 27.1 |         |
| 6-10                      | 68     | 24.9 | 6            | 18.2 | 62        | 25.8 |         |
| 10+                       | 63     | 23.1 | 4            | 12.1 | 58        | 24.2 |         |
| <b>Occupation</b>         |        |      |              |      |           |      |         |
| Agri based                | 37     | 13.6 | 4            | 12.1 | 33        | 13.8 | 0.003   |
| Daily wagers              | 89     | 22.3 | 14           | 42.4 | 75        | 31.3 |         |
| Sales and services        | 115    | 28.2 | 6            | 18.2 | 109       | 45.4 |         |
| Others                    | 32     | 35.9 | 9            | 27.3 | 23        | 9.6  |         |
| <b>Asset Quartiles</b>    |        |      |              |      |           |      |         |
| 1 <sup>st</sup> (Lowest)  | 17     | 6.2  | 12           | 36.4 | 5         | 2.0  | 0.000   |
| 2 <sup>nd</sup>           | 111    | 40.6 | 13           | 39.4 | 98        | 41.0 |         |
| 3 <sup>rd</sup>           | 113    | 41.4 | 5            | 15.1 | 108       | 45.0 |         |
| 4 <sup>th</sup>           | 32     | 11.8 | 3            | 9.1  | 29        | 12.0 |         |
| <b>Presence of cough</b>  |        |      |              |      |           |      |         |
| Yes                       | 226    | 82.8 | 29           | 87.8 | 197       | 82.1 | 0.408   |
| No                        | 47     | 17.2 | 4            | 12.2 | 43        | 17.9 |         |
| <b>Duration of cough</b>  |        |      |              |      |           |      |         |
| Less than 14 days         | 51     | 18.7 | 6            | 18.2 | 45        | 18.2 | 0.937   |
| ≥ 15 days                 | 222    | 81.3 | 27           | 81.8 | 195       | 81.8 |         |
| <b>Number of symptoms</b> |        |      |              |      |           |      |         |
| ≤ 2                       | 44     | 16.1 | 4            | 12.1 | 40        | 16.7 | 0.556   |
| 3-4                       | 79     | 29.0 | 8            | 24.2 | 71        | 29.6 |         |
| 5+                        | 150    | 54.9 | 21           | 63.7 | 129       | 53.8 |         |

1  
2  
3 Among the 240 cases detected passively under NTP, 118 (49.1%) sought initial care from  
4 informal providers, 106 (44.2%) from formal providers, and 16 (6.7%) used self care. All of the  
5  
6  
7  
8 33 actively detected cases reported self care as the initial strategy, totaling this group to 49  
9  
10 (17.9%) of all cases (Fig 1). Out of the 118 passively detected NTP cases with initial care from  
11  
12 the informal sector, 52 (44.1%) remained in the informal sector, while 61 (51.7%) switched to a  
13  
14 formal provider for care at the second point care. Again, among the 52 who remained in the  
15  
16 informal care sector, at the third point of care 32 (61.5%) migrated to formal care sector, while  
17  
18 17 (32.7%) remained in the informal sector. The proportion of patient who remained in the  
19  
20 informal care sector up to the fourth point care was five (29.4%) of those stating their health  
21  
22 seeking behavior in the informal sector. (Fig 1). Among the 16 (6.7%) of the NTP cases who  
23  
24 reported self care as their initial strategy ultimately four (25.0%) remained in this stage up to  
25  
26 fourth point of care, three (18.8 %) moved to informal sector and nine (56.2%) migrated to  
27  
28 formal care sector subsequently. Among the active detected cases, all of whom had self care as  
29  
30 the initial strategy, 27 (81.8%) remained at this stage before being detected by the survey.  
31  
32  
33

34  
35 Among the remaining six, three shifted to the formal sector at the second point of care, while the  
36  
37 other three switched between informal and formal providers in the subsequent points of care (Not  
38  
39 shown).  
40  
41  
42

43  
44 We looked into measures taken at each point of care by the formal and informal providers. In the  
45  
46 formal care sector, the primary action was to prescribe drugs at each point of care starting with  
47  
48 79 (74.5%) at first point, 43 (70.5%) at the second point, 19 (59.4%) at the third and 10 (91%) at  
49  
50 the fourth point of care. Ordering diagnostic investigations varied from 19 (17.9%) at the first  
51  
52 point of care, to 14 (22.9%) at the second, 10 (31.2%) at the third, and 1 (9.0%) at the fourth  
53  
54 point of care. Referral for further investigation was seldom done (0-2%). The informal providers  
55  
56  
57  
58  
59  
60

1  
2  
3 on the other hand, prescribed drugs in 80% to 99% of the encounters, and seldom ordered  
4  
5 diagnostic investigations or referred the individual for further investigations at any of the four  
6  
7 points of care. (Fig 2).  
8  
9

10  
11 The reasons for not seeking care at all were available only from the 33 survey cases. The major  
12  
13 reasons were not considering symptoms serious enough, and monetary constraints.  
14  
15  
16  
17  
18  
19  
20  
21  
22  
23  
24  
25  
26  
27  
28  
29  
30  
31  
32  
33  
34  
35  
36  
37  
38  
39  
40  
41  
42  
43  
44  
45  
46  
47  
48  
49  
50  
51  
52  
53  
54  
55  
56  
57  
58  
59  
60

For peer review only

## DISCUSSION

Our study showed that most of the initial care seeking by passively identified TB cases happened at the informal sector or was limited to self care. At each following round of care seeking a third to a half remained in the informal care sector. Among **actively** detected cases, more than 80% remained in the self care sector up to the time of their identification by the survey. Case management in the informal sector was restricted to prescribing any medications, with non existence of any diagnostic investigations or referrals.

Preference for informal providers as initial place of care has been reported from Bangladesh and elsewhere.[3-5,9,12] In chronic conditions where the symptoms onset is slow and insidious like tuberculosis, people usually consult with an informal provider available at hand or consume over the counter drugs. This behavior can cause a marked delay to starting appropriate TB medication, given the fact that TB medication in line with the NP guideline is seldom present in the informal health sector. This has been observed in earlier studies from Bangladesh.[4] Our study adds the important finding that this preference of the informal sector persists throughout the care seeking trajectory. The lack of (referral for) diagnostic investigation can cause additional systems delay (between care seeking and starting appropriate treatment). An earlier study reported that this type of delay could be more than ten weeks.[4] Delay to reach appropriate care and treatment impacts on the course of the disease and may result in unfavorable outcomes and ongoing transmission.[22] From a programmatic point of view, this situation leads to a marked under reporting of TB cases.

Care seeking from the informal sector is not limited to TB only, but rather a common feature for all chronic conditions in Bangladesh.[15,23] It is suggested that the presence of huge numbers of

1  
2  
3 informal providers in both rural and urban areas, their easy accessibility due to reduced cost, and  
4  
5 minimal levels of stigma when attending such providers, encourage people to seek care from this  
6  
7 sector first.[15,23,24] A good portion of them are simple drug sellers providing drugs without  
8  
9 further diagnostic procedures.[12] **This easy access to informal providers stimulates**  
10  
11 **“shopping for care”, when care is sought form informal providers subsequently one after**  
12  
13 **one, as observed in our study.** In Malawi, care seeking among TB patients noted that multiple  
14  
15 contacts in range of 1-15 were made before the dagnosis.[25] Similarly in vietnam patients  
16  
17 made on average 1.3 contacts and 2.5 visit per providers before getting appropriate TB serivecs,  
18  
19 even though the size private sector was very small.[26]  
20  
21  
22  
23  
24

25 We observed that the case management was not altogether different in the formal and informal  
26  
27 sector with respect to prescribing drugs. However, unlike in the formal sector, there was almost  
28  
29 a complete absence of diagnostic procedures and referrals in the informal sector. We need to  
30  
31 carefully interpret these findings as we don't have information what drugs were prescribed by the  
32  
33 providers. Retrospective recording of actual drugs through patient interviews is difficult and in  
34  
35 most case unreliable. In Bangladesh, Fixed Dose Combination (FDC) anti TB drugs are almost  
36  
37 exclusively available at DOTS centres. This implies that medication provided through the  
38  
39 informal sector is unlikely to be adequate for the management of TB. But formal providers can  
40  
41 manage TB cases outside the context of DOTS centers. As such mismanagement of TB can also  
42  
43 occur in the formal sector, given the low occurrence of diagnostic investigations.  
44  
45  
46  
47  
48

49 A study in Malawi provided insight in the type of mediation provided to individuals with TB  
50  
51 symptoms but without a formal diagnosis. The authors reported that 61% of cases had been  
52  
53 treated with atibiotics like co-trimoxazole, doxycycline, and penicillin.[25]  
54  
55  
56  
57  
58  
59  
60

1  
2  
3 **NTP also recognizes the absence of standard practices in the private sector and the lack of**  
4 **sufficient interaction and formal linkages between NTP and these private sector providers.**  
5  
6  
7

8 The lessons learnt from studies aimed at establishing connections between formal and informal  
9 health care providers remain unexplored.[13,27] Our study indicates that despite the country  
10 coverage by DOTS, and public-private-partnership activities undertaken by the NTP, the impact  
11 did not result in reducing the disconnect between NTP and the informal health sector. In a recent  
12 attempt to improve the situation, NTP in partnership with icddr,b and United States Agency for  
13 International Development (USAID) is implementing a “Translating research into action  
14 (TRAction)” project to test different implementation strategies, with a clear role for the informal  
15 providers. This current study suggests that attempt is timely and needed.  
16  
17  
18  
19  
20  
21  
22  
23  
24  
25  
26

27  
28 One of the potential limitations of the study is the potential for minor selection bias. Although all  
29 participants were randomly selected, the selection of clusters was not stratified by urban/rural  
30 setting. The study sample therefore does not fully represent the 70% of the rural population in  
31 Bangladesh. There was also a slight overrepresentation of males. However the national case  
32 notification is more or less static at 3:1 male to female since the inception of DOTS in 1993.[1]  
33  
34  
35  
36  
37  
38  
39  
40  
41  
42  
43  
44  
45  
46  
47  
48  
49  
50  
51  
52  
53  
54  
55  
56  
57  
58  
59  
60

The strengths of the study are that the cases were interviewed at home by trained research coordinators providing an enabling study setting. We explored the care seeking of both actively and passively detected cases which would cover care seeking from a wider perspective of two different kinds of cases, one who is probably in the early phase of the disease process and the other probably in a more advanced condition. Moreover we have covered the care seeking up to fourth point of care, which is expected to give a more comprehensive picture of the care seeking by the TB cases in Bangladesh.



1  
2  
3 In conclusions it can be said that most of the initial care seeking by different types of TB cases  
4 was sought **from** informal providers or was limited to self care, and that a large proportion of  
5 these cases remained in the informal sector during subsequent care seeking. It is imperative that  
6 the NTP should immediately take initiatives to engage all types of care providers, particularly the  
7 informal providers. It is also necessary to strengthen the ongoing advocacy communication and  
8 social mobilization (ACSM) activities to increase awareness on key TB symptoms, availability  
9 of diagnosis and free treatment in an attempt to stimulate appropriate care seeking, and to  
10 prevent unnecessary delay in TB case management.  
11  
12  
13  
14  
15  
16  
17  
18  
19  
20  
21  
22  
23  
24  
25  
26  
27  
28  
29  
30  
31  
32  
33  
34  
35  
36  
37  
38  
39  
40  
41  
42  
43  
44  
45  
46  
47  
48  
49  
50  
51  
52  
53  
54  
55  
56  
57  
58  
59  
60

## Acknowledgements

We thankfully acknowledge National Tuberculosis Control Programme (NTP) of Bangladesh for their continuous support throughout this study. We also acknowledge the technical assistance provided by KNCV Tuberculosis Foundation, The Netherlands. Our thanks go to all NTP partners like BRAC, Damien Foundation and others and individuals involved in this survey for their support throughout the study period. We sincerely acknowledge the contribution of our project staff and community members from all over the country, without whom this study would never have been materialized.

**Contributors** Shahed Hossain was responsible for conception and design of the study, analysis and interpretation of data and writing the manuscript. Martien Borgdorff, Frank van Leth and K Zaman participated in the conception and design of the study, analysis and interpretation of data as well as revising the draft. Abdul Quaiyum, Sayera Banu, Ashaque Husain and Akramul Islam participated in the analysis and interpretation of data and substantially revising the paper.

**Funding** This research study was funded by World Health Organization (WHO), United States Agency for International Development (USAID) and Global Fund to Fight AIDS, Tuberculosis and Malaria (GFATM), grant number SEBAN TUB 001 XW06U. icddr,b acknowledges with gratitude the commitment of WHO, USAID and GFATM to its research efforts.

The funders had no role in the study design, data collection and analysis, decision to publish or preparation of the manuscript.

**Competing interest:** None

1  
2  
3  
4 **Ethics approval** This study was approved through an Institutional Review Board of icddr,b  
5  
6 (IRB, FWA-00001468) which is internationally accorded and participated by members from  
7  
8 international and national experts. Verbal and written consent was obtained in all cases after  
9  
10 informed appraisal.  
11  
12

13  
14 **Data sharing statement** Additional data from this survey are being analyzed and will be  
15  
16 published in future  
17  
18  
19  
20  
21  
22  
23  
24  
25  
26  
27  
28  
29  
30  
31  
32  
33  
34  
35  
36  
37  
38  
39  
40  
41  
42  
43  
44  
45  
46  
47  
48  
49  
50  
51  
52  
53  
54  
55  
56  
57  
58  
59  
60

## REFERENCES

1. World Health Organization. *Global Tuberculosis Report 2013*. World Health Organization, Geneva. WHO/HTM/TB/2013.11
2. Directorate General of Health Services (DGHS). *Tuberculosis in Bangladesh: Annual Report 2012*. National Tuberculosis Control Programme (NTP), Dhaka.
3. Zafar Ullah AN, Haque R, Begum V, *et al*. Public Private Partnership for TB control in Bangladesh: role of medical practitioners in management of TB patients. *World Medical & Health Policy* 2010; 2:217-34.
4. Rifat M, Rusen ID, Islam MDA, *et al*. Why are tuberculosis patients not treated earlier? A study of informal health practitioners in Bangladesh. *Int J Tuberc Lung Dis* 2011;15:647-51.
5. Hossain S, Quaiyum MA, Zaman K, *et al*. Socio Economic Position in TB Prevalence and Access to Services: Results from a Population Prevalence Survey and a Facility-Based Survey in Bangladesh. *PLoS ONE* 2012; 7:1-8. <http://www.plosone.org/article/info:doi/10.1371/journal.pone.0044980> (Accessed: 5 August 2013).
6. Rieder H. Case finding in Tuberculosis: a comprehensive international approach. In: L. Reichman & E. Hershfield (eds). Marcel Dekker Inc, New York, 1993;167-182.
7. Pinto LM, Udwardia ZF. Private patients' apperceptions about a public programme; what do private Indian tuberculosis patients really feel about directly observed treatment? *BMC Public Health* 2010; 10 (357);1-5. <http://www.biomedcentral.com/1471-2458/10/357> (Accessed: 5 August 2013).
8. Gwatkin DR, Bhuiya A, Victora CG. Making Health Systems more Equitable. *Lancet*, 2004;364,1273-80.

- 1  
2  
3 9. Yimer S, Holm-Hansen C, Yimaldu T, *et al.* Health care seeking among pulmonary  
4 tuberculosis suspects and patients in rural Ethiopia: a community-based study. *BMC Public*  
5  
6 *Health* 2009; 9(454):1-9. <http://www.biomedcentral.com/1471-2458/9/454> (Accessed: 5  
7  
8 August 2013).
- 9  
10  
11  
12 10. Ahmed SM, Evans TG, Standing H, *et al.* Bangladesh: Innovation for Universal Health  
13 Coverage 2: Harnessing pluralism for better health in Bangladesh. *Lancet* 2013; 382: 1746–  
14  
15 55.
- 16  
17  
18  
19 11. Director General of Health Services (DGHS). *National TB guidelines 2009*, Fourth edition,  
20  
21 2009; Ministry of Health and Family Welfare, Government of Bangladesh.
- 22  
23  
24  
25 12. Hossain S, Larson CP, Quaiyum MA, *et al.* Adults with chronic cough in urban Bangladesh:  
26  
27 healthcare utilization and management of cases by private practitioners. *World Health &*  
28  
29 *Population* 2010;12:5-17.
- 30  
31  
32 13. Zafar Ullah AN, Huque R, Husain A, *et al.* Effectiveness of involving the private medical  
33  
34 sector in the National TB Control Programme in Bangladesh: evidence from mixed  
35  
36 methods. *BMJ Open* 2012;2(6):1-8. <http://bmjopen.bmj.com/content/2/6/e001534.long>  
37  
38 (Accessed: 5 August, 2013).
- 39  
40  
41 14. Ahmed SM, Hossain MA. Mapping of the health care providers in Bangladesh. In: James P  
42  
43 Grant School of Public Health, Health Workforce in Bangladesh: Who constitutes the  
44  
45 healthcare system? The state of health in Bangladesh 2007, *Bangladesh Health Watch 2007*.  
46  
47 BRAC University, Dhaka.2008.
- 48  
49  
50 15. Desmet M, Bashir I, Sohel N. Illness profile and health care utilization patterns of slum  
51  
52 residence in Dhaka city, Bangladesh. Health care seeking studies. International Centre for  
53  
54  
55  
56  
57  
58  
59  
60

- 1  
2  
3 Diarrhoeal Disease research, Bangladesh (ICDDR,B): Dhaka. *ICDDR,B Working Paper*  
4  
5 *No.111*. 1998;128-132.  
6  
7
- 8 16. World Health Organization. Involving private practitioners in tuberculosis control: Issues,  
9 interventions, and emerging policy framework. World Health Organization, Geneva 2001;  
10 WHO/CDS/TB/2001.285.  
11  
12
- 13 17. Malmborg R, Mann G, Thomson R, *et al*. Can Public-private collaboration promote  
14 tuberculosis case detection among the poor and vulnerable? *Bulletin of the World Health*  
15 *Organization* 2006;84:752-58  
16  
17
- 18 18. Zaman K, Hossain S, Banu S, *et al*. Prevalence of smear positive tuberculosis in persons  
19 aged  $\geq 15$  years in Bangladesh: results from a national survey 2007-2009. *Epidemiology*  
20 *and Infection* 2012;140:1018-27.  
21  
22
- 23 19. van Leth F, Guilatco RS, Hossain S, *et al*. Measuring socio economic data in tuberculosis  
24 prevalence surveys. *Int J Tuberc Lung Dis* 2011;15: 558-63.  
25  
26
- 27 20. Gwatkin DR, Rutstein S, Johnson K, *et al*. Country reports on HNP and Poverty. *Socio-*  
28 *Economic Differences in Health, Nutrition and Population. Bangladesh: 1996/97,*  
29 *1999/2000, 2004*. Washington, DC, World Bank, Human Development Network, Health,  
30 Nutrition and Population.  
31  
32
- 33 21. Bangladesh Demographic and health Survey 1999-2000. National Institute of population,  
34 Research and Training (NIPORT), Mitra and Associates, Measure DHS+, ORC Macro,  
35 Calverton, Maryland, USA. 2001.  
36  
37
- 38 22. Jianzhao H, van den Hof S, Lin X, *et al*. Risk factors for non-cure among new sputum smear  
39 positive tuberculosis patients treated in tuberculosis dispensaries in Yunnan, China. *BMC*  
40  
41  
42  
43  
44  
45  
46  
47  
48  
49  
50  
51  
52  
53  
54  
55  
56  
57  
58  
59  
60

1  
2  
3 *Health Services Research* 201;1: 97.<http://www.biomedcentral.com/1472-6963/11/97>

4  
5  
6 (Accessed: August 7, 2013).

- 7  
8 23. Ahmed SM. *Exploring health-seeking behaviour of disadvantaged populations in rural*  
9  
10 *Bangladesh*. PhD Thesis. Karolinska Institutet. Stockholm 2005.
- 11  
12 24. Ahmed SM, Hossain MA, Chowdhury MR. Informal sector providers in Bangladesh: how  
13  
14 equipped are they to provide rational health care? *Health Policy and Planning* 2009;24,467–  
15  
16 78.
- 17  
18 25. Salaniponi FML, Harries AD, Banda HT, *et al.* Care seeking behaviour and diagnostic  
19  
20 processes in patients with smear-positive pulmonary tuberculosis in Malawi. *Int J Tuberc*  
21  
22 *Lung Dis* 2000;4:327-32.
- 23  
24 26. Lonroth K, Thuong LM, Linh PD, *et al.* Utilization of private and public health care  
25  
26 providers for tuberculosis symptoms in Ho Chi Minh city, Vietnam. *Health Policy and*  
27  
28 *Planning* 2001;16:47-54.
- 29  
30 27. Salim HMA, Uplekar M, Daru P, *et al.* Turning liabilities into resources: Informal village  
31  
32 doctors and tuberculosis control in Bangladesh. *Bulletin of World Health Organization*  
33  
34 2006;84:479-84.
- 35  
36  
37  
38  
39  
40  
41  
42  
43  
44  
45  
46  
47  
48  
49  
50  
51  
52  
53  
54  
55  
56  
57  
58  
59  
60

1  
2  
3  
4  
5 **Fig 1: Care seeking at different points of care**  
6

7 **Fig 2: Actions taken if care sought from formal and informal providers**  
8  
9  
10  
11  
12  
13  
14  
15  
16  
17  
18  
19  
20  
21  
22  
23  
24  
25  
26  
27  
28  
29  
30  
31  
32  
33  
34  
35  
36  
37  
38  
39  
40  
41  
42  
43  
44  
45  
46  
47  
48  
49  
50  
51  
52  
53  
54  
55  
56  
57  
58  
59  
60

For peer review only



1  
2  
3  
4  
5  
6  
7  
8  
9  
10  
11  
12  
13  
14  
15  
16  
17  
18  
19  
20  
21  
22  
23  
24  
25  
26  
27  
28  
29  
30  
31  
32  
33  
34  
35  
36  
37  
38  
39  
40  
41  
42  
43  
44  
45  
46  
47  
48  
49  
50  
51  
52  
53  
54  
55  
56  
57  
58  
59  
60

Fig 1: Care seeking at different points of care

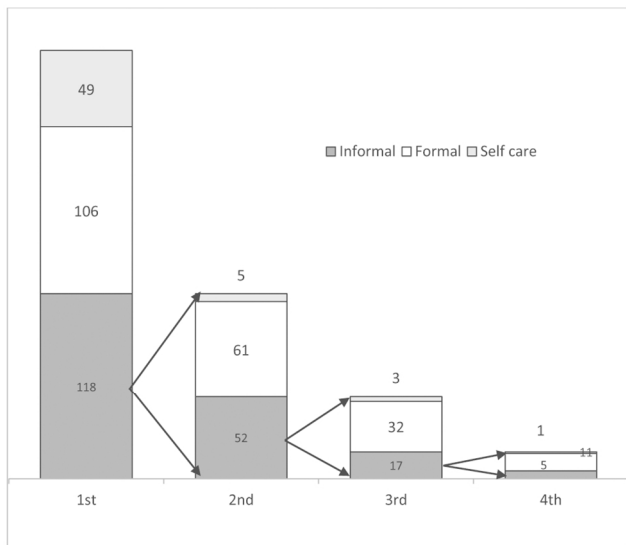

101x152mm (300 x 300 DPI)

1  
2  
3  
4  
5  
6  
7  
8  
9  
10  
11  
12  
13  
14  
15  
16  
17  
18  
19  
20  
21  
22  
23  
24  
25  
26  
27  
28  
29  
30  
31  
32  
33  
34  
35  
36  
37  
38  
39  
40  
41  
42  
43  
44  
45  
46  
47  
48  
49  
50  
51  
52  
53  
54  
55  
56  
57  
58  
59  
60

**Fig 2: Actions taken if care sought from formal and informal providers**

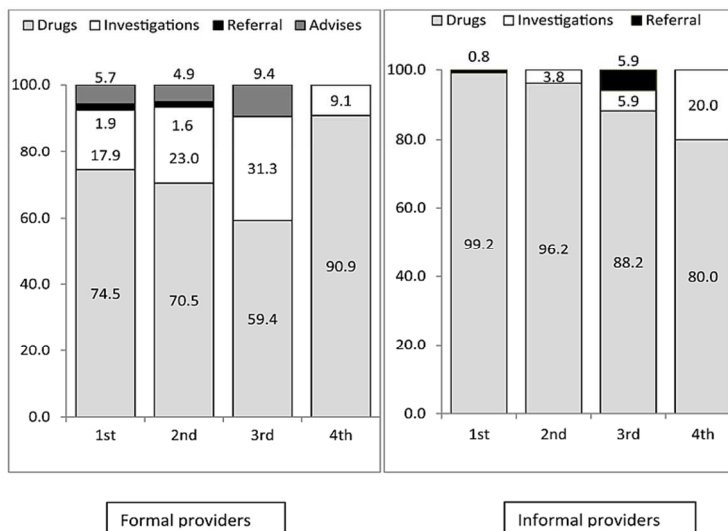

90x53mm (300 x 300 DPI)

review only

## STROBE Statement—checklist of items that should be included in reports of observational studies

|                              | Item No | Recommendation                                                                                                                                                                                                                                                                                                                 |
|------------------------------|---------|--------------------------------------------------------------------------------------------------------------------------------------------------------------------------------------------------------------------------------------------------------------------------------------------------------------------------------|
| <b>Title and abstract</b>    | 1       | (a) Study's design is mentioned in the title and abstract<br>(b) Precise and concise information on study methods and findings given in the abstract                                                                                                                                                                           |
| <b>Introduction</b>          |         |                                                                                                                                                                                                                                                                                                                                |
| Background/rationale         | 2       | Comprehensive background and rationale provided                                                                                                                                                                                                                                                                                |
| Objectives                   | 3       | Specific objectives described                                                                                                                                                                                                                                                                                                  |
| <b>Methods</b>               |         |                                                                                                                                                                                                                                                                                                                                |
| Study design                 | 4       | Specific design adopted with relevant references are given                                                                                                                                                                                                                                                                     |
| Setting                      | 5       | The setting is adequately described with all relevant information and references.<br>One relevant document is uploaded.                                                                                                                                                                                                        |
| Participants                 | 6       | (a) <i>Cross-sectional study</i> —Sources and methods of data collection are given as separate paragraphs.                                                                                                                                                                                                                     |
| Variables                    | 7       | All the variables are defined and adequate explanation given.                                                                                                                                                                                                                                                                  |
| Data sources/<br>measurement | 8*      | A separate paragraph on measurement described details on methods of assessment.                                                                                                                                                                                                                                                |
| Bias                         | 9       | Described in discussion and limitation section                                                                                                                                                                                                                                                                                 |
| Study size                   | 10      | Explained                                                                                                                                                                                                                                                                                                                      |
| Quantitative variables       | 11      | A details description on statistical analysis is given                                                                                                                                                                                                                                                                         |
| Statistical methods          | 12      | (a) All statistical methods described<br>(b) Described examination of subgroups<br>(c) No possible missing data anticipated<br>(d) <i>Cross-sectional study</i> —Not much impact for sampling was anticipated, so separate analytical approach to account for sampling strategy needed<br>(e) There is no sensitivity analyses |
| <b>Results</b>               |         |                                                                                                                                                                                                                                                                                                                                |
| Participants                 | 13*     | (a) All participants were eligible, no refusal, no missing data reported<br>(b) Not applicable<br>(c) Not necessary                                                                                                                                                                                                            |
| Descriptive data             | 14*     | (a) General characteristics of study participants given in Table 1<br>(b) No such data<br>(c) N/A                                                                                                                                                                                                                              |
| Outcome data                 | 15*     | <i>Cross-sectional study</i> —Summary measures reported                                                                                                                                                                                                                                                                        |
| Main results                 | 16      | (a) The main analysis did not include any confounding estimates<br>(b) Applicable description of variables given<br>(c) No relevant                                                                                                                                                                                            |
| Other analyses               | 17      | Report other analyses done—Graphical presentation given                                                                                                                                                                                                                                                                        |

**Discussion**

---

|                  |    |                                                                                  |
|------------------|----|----------------------------------------------------------------------------------|
| Key results      | 18 | Summarise key results given                                                      |
| Limitations      | 19 | Discuss limitations of the study: Discussed                                      |
| Interpretation   | 20 | Possible and cautious interpretation of overall results given                    |
| Generalisability | 21 | Discuss the generalisability (external validity) of the study results: Discussed |

---

**Other information**

---

|         |    |                                                                                                                                                                      |
|---------|----|----------------------------------------------------------------------------------------------------------------------------------------------------------------------|
| Funding | 22 | Give the source of funding and the role of the funders for the present study and, if applicable, for the original study on which the present article is based: Given |
|---------|----|----------------------------------------------------------------------------------------------------------------------------------------------------------------------|

---

\*Give information separately for cases and controls in case-control studies and, if applicable, for exposed and unexposed groups in cohort and cross-sectional studies.

**Note:** An Explanation and Elaboration article discusses each checklist item and gives methodological background and published examples of transparent reporting. The STROBE checklist is best used in conjunction with this article (freely available on the Web sites of PLoS Medicine at <http://www.plosmedicine.org/>, Annals of Internal Medicine at <http://www.annals.org/>, and Epidemiology at <http://www.epidem.com/>). Information on the STROBE Initiative is available at [www.strobe-statement.org](http://www.strobe-statement.org).
